# Supplementary material for: Synthesis of 2,6-Diaminotriptycene Conjugates with Chiral Auxiliaries: Towards the Scalable Resolution of Crucial Triptycene Intermediates
Source: MDPI journal article supplement (doi:10.3390/sym16010116), 2024-01-18
Supplement: s1 [file s1]

Supporting information for:

# **Synthesis of 2,6-Diaminotriptycene Conjugates with Chiral Auxiliaries: Towards the Scalable Resolution of Crucial Triptycene Intermediates**

Giovanni Preda, Emanuele Casali, Alessio Porta and Dario Pasini

Department of Chemistry and INSTM, University of Pavia, Via Taramelli 12, 27100 Pavia, Italy

## **Index**

1. Chromatographic analyses
2. Computational details
3.  $^1\text{H}$ -NMR and  $^{13}\text{C}$ -NMR spectra of new compounds
4. Mass spectra of new compounds

## 1. Chromatographic analyses.

*HESI determinations* were performed with MS spectrometer Thermo Scientific (Milan, Italy) LTQ XL HESI-MS/MS system using direct injection of purified fractions. HESI Probe: Gas = N<sub>2</sub>, T = 70°C, Voltage=3.6 kV; Capillary T = 275°C, Voltage = 48V, Tube Lens=70V. Tune Settings: Multipole 00 Offset = 2.5V, Lens 0 = - 4.28V, Multipole 0 Offset = -5.12V, Lens 1 = - 8.91, Gate Lens = - 66.1V, Multipole 1 Offset = - 6.5V, Multipole RF Amplitude (p-p)= 400V, Front Lens = - 6.1V. Settings for MS-MS and MS<sup>3</sup>: detection by CID (Collision Induced Dissociation); Isolation Width:  $\pm 2$  amu; Activation Q: 0.250; Activation Time 30.0 msec. Isolation width for quantitation  $\pm 2.5$  amu.

*UHPLC analysis* were carried out using: Instrument: The chromatographic analysis was performed with a UHPLC apparatus JASCO (Lecco, Italy) X-LC system coupled with a MS spectrometer Thermo Scientific (Milan, Italy) LTQ XL HESI-MS/MS system. The column used for chromatographic separation was a RESTEK Raptor®, RP-C18 column id = 2.1 mm, length = 50 mm and particle size = 1.8  $\mu$ m (equipped with a similar pre-column). After an equilibration period of 5 min, 2-5  $\mu$ L of each sample were injected in the UPLC system. Isocratic elution was performed with acetonitrile/water–0.2% HCOOH (10:90) as a mobile phase, the flow rate was 0.3 mL min<sup>-1</sup> for 1 min, gradient was increased to 100% acetonitrile after 10 min. The column temperature was maintained at 40 °C with “on-line” oven equipment, and the total run time was 15 min (including a 4 min of column washing performed with pure ACN at same flow). To obtain best performance for separation the samples were tested with more powerful Raptor®, RP-C18 column id = 2.1 mm, length = 100 mm and particle size = 1.8  $\mu$ m. The HPLC analysis with chiral analytical column were carried out using Shimadzu HPLC for standard mobile phases and JASCO HPLC/SFC instruments equipped with chiral column. The results are summarized in the table below.

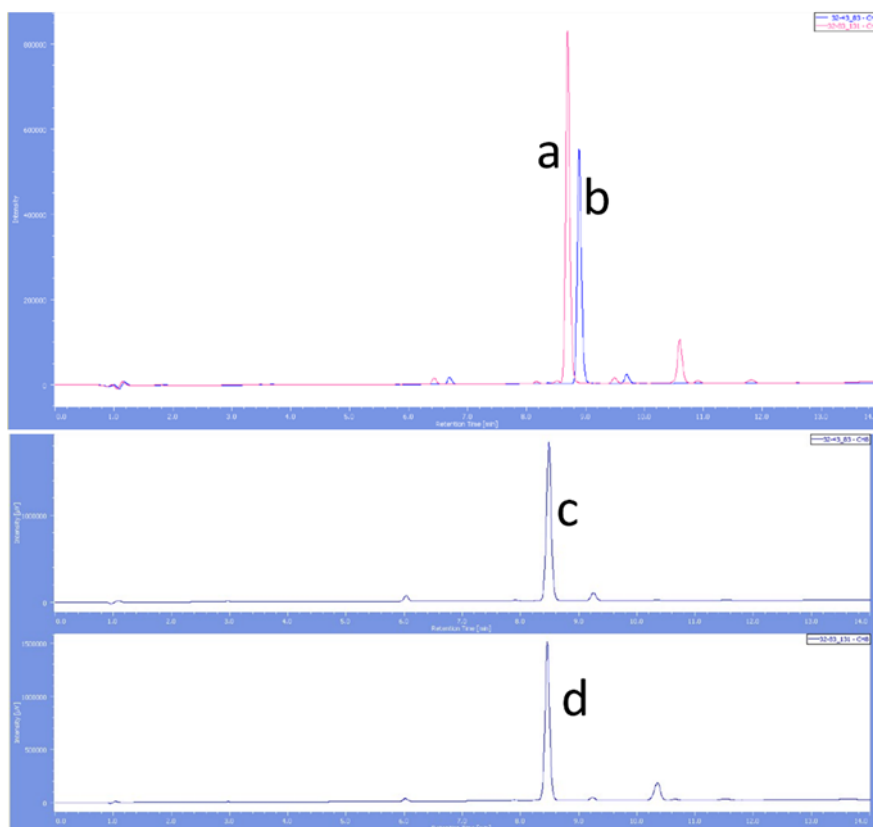

**Figure S1.** UHPLC analysis of the first (a or c) and last (b or d) eluting fractions of **1d** from flash column chromatography by injecting 1 microliter of a 0.25 mg/mL solution of analyte (a and b) or 3 microliters of a 0.75 mg/mL solution of analyte (c and d).

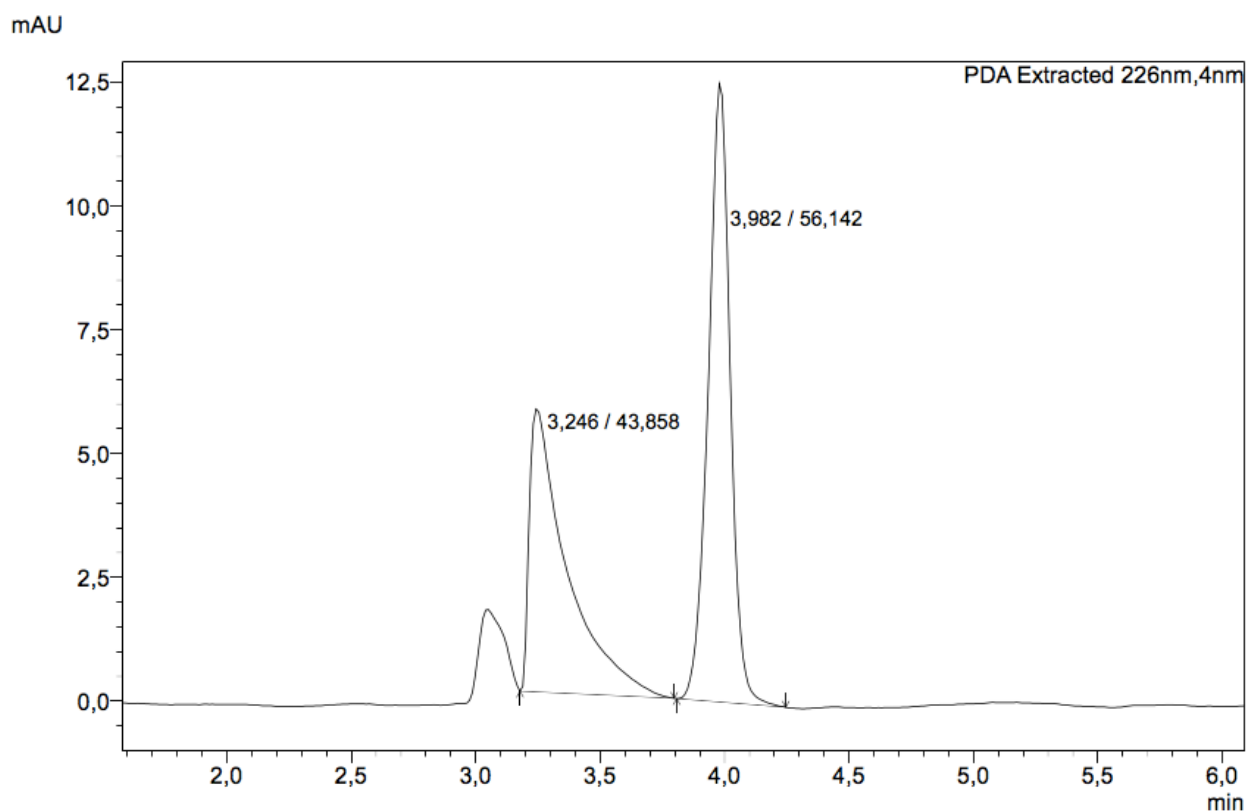

**Figure S2.** HPLC trace of compound **1b** obtained with Chiralcel® OD-3 phase. HPLC conditions: Flow 1 mL/min, eluent: 98:2 *n*Heptane-*iso*PrOH, extraction at maximum absorbance (226 nm) of compound **1b**. Solution 5 mg/mL, injection = 15  $\mu$ L.

**Table S1.** Bad = bad separation, undefined peaks; Poor = poor separation, not resolved peaks; Acceptable = low separation with identified peaks; Good = nice separation. Separated with Raptor® RP18 UHPLC column.

| <b>Compound/Conditions</b> | <b>Chirapak®<br/>AS-H</b> | <b>Chiralcel®<br/>OD-3</b> | <b>Chirapak®<br/>IA-3</b> | <b>Chirapak®<br/>IB-3</b> | <b>Chirapak®<br/>IC-3</b> | <b>UHPLC<br/>Restek<br/>Raptor</b> |
|----------------------------|---------------------------|----------------------------|---------------------------|---------------------------|---------------------------|------------------------------------|
| <b>1a</b>                  | Bad                       | Bad                        | Bad                       | Bad                       | Bad                       | Single peak                        |
| <b>1b</b>                  | Bad                       | Acceptable                 | Poor                      | bad                       | bad                       | Poor                               |
| <b>1c</b>                  | Bad                       | Poor                       | Poor                      | Bad                       | Bad                       | Single peak                        |
| <b>1d</b>                  | Bad                       | Bad                        | Bad                       | Bad                       | Bad                       | Good                               |
| <b>1e</b>                  | Bad                       | Poor                       | Poor                      | Bad                       | Bad                       | Single peak                        |

## 2. Computational details

**Product conformers search.** The product structures utilized in the study were prepared using GaussView6 software and underwent a manual conformational sampling towards all the possible rotamers of both the amidic bonds and the ramification within the molecular structure of the chiral auxiliary. Both  $C_2$  symmetrical and unsymmetrical systems were investigated. The so obtained conformers were then subjected to the low level of theory optimization and the most stable ones were then involved in the single point calculation to account for the role of solvent. The weight of conformations that do not show  $C_2$  symmetry (**1-d-a** and **1-d'-c**) was counted twice for statistical reasons.

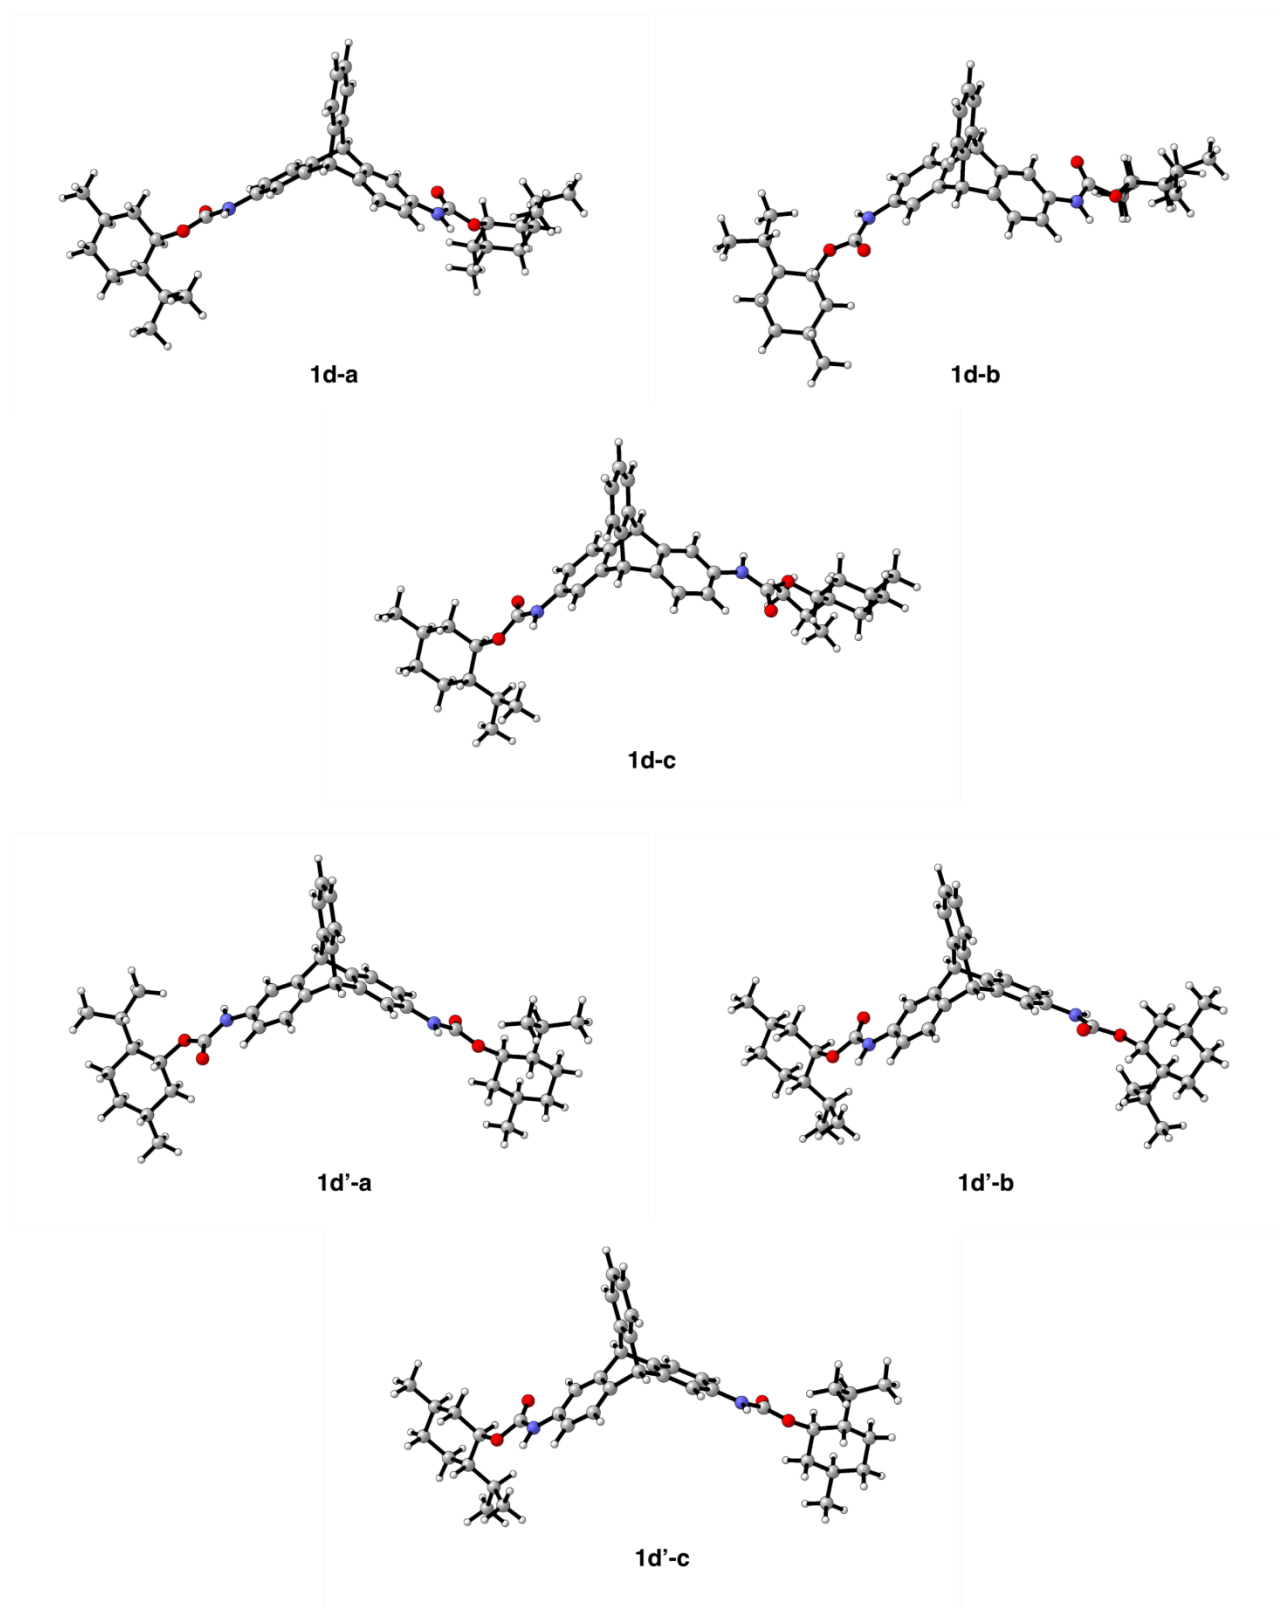

**Figure S3.** Conformer analysis for diastereomers **1d** and **1d'**. [SMD(DCM)-M06-2X/def2svp//B3LYP/6-31g(d)]

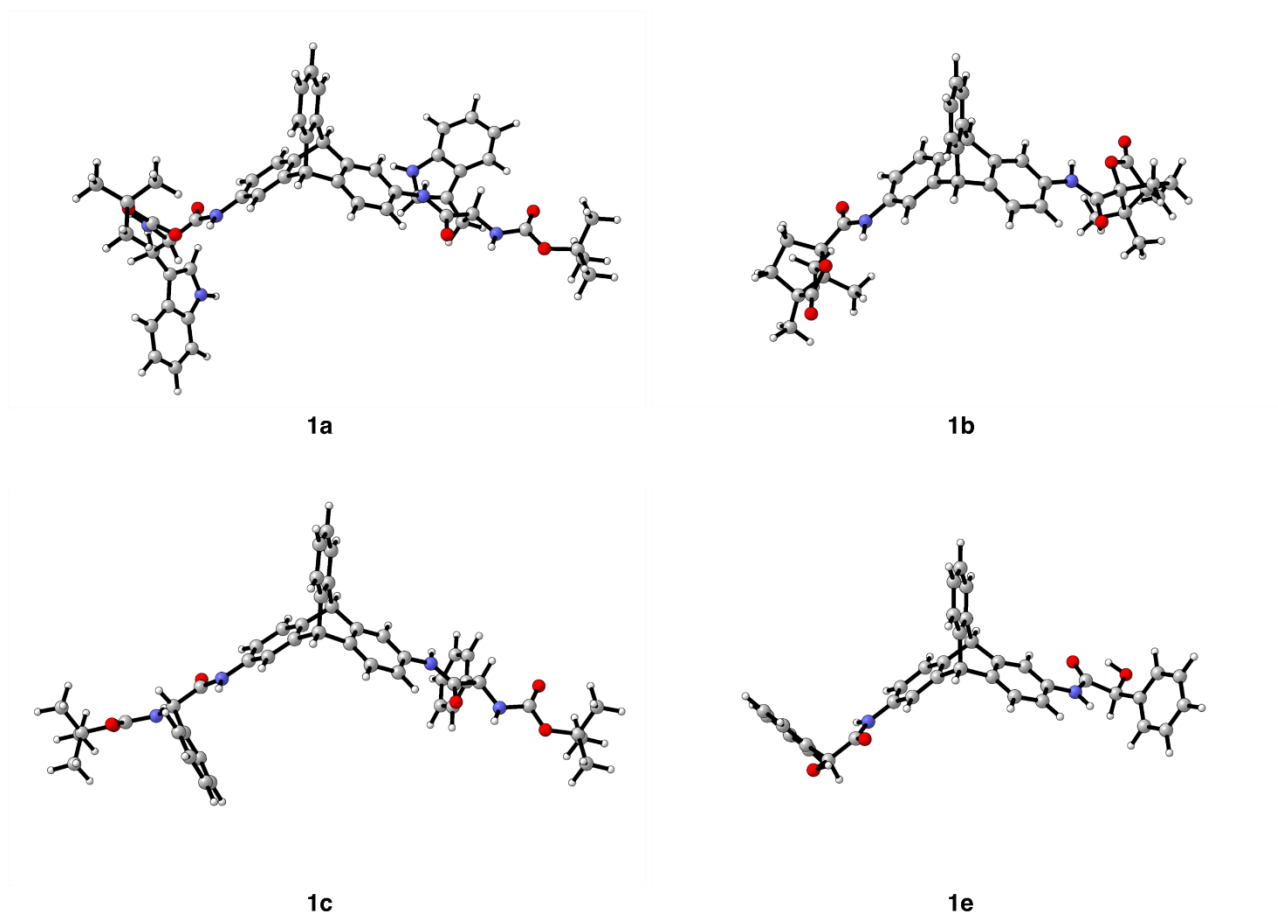

**Figure S4.** Most stable conformers for **1a**, **1b**, **1c** and **1e**. [SMD(DCM)-M06-2X/def2svp//B3LYP/6-31g(d)]



**Table S2.** Boltzmann population analysis, dipole moment and polarizability for conformers of **1d**

|               | $\Delta\Delta G$ (kcal mol <sup>-1</sup> ) | Boltzmann<br>population | Dipole<br>(Debye) | Polarizability<br>( $\alpha$ ) | Dipole weighted<br>(Debye) | Polarizability<br>weighted ( $\alpha$ ) |
|---------------|--------------------------------------------|-------------------------|-------------------|--------------------------------|----------------------------|-----------------------------------------|
| <b>1-d-a</b>  | 0.0                                        | <b>61.9</b>             | 4.70              | 617.43                         |                            |                                         |
| <b>1-d-b</b>  | 0.2                                        | <b>22.9</b>             | 2.89              | 616.61                         | 3.59                       | 617.31                                  |
| <b>1-d-c</b>  | 0.4                                        | <b>15.2</b>             | 0.09              | 617.90                         |                            |                                         |
| <b>1-d'-a</b> | 0.1                                        | <b>28.9</b>             | 0.48              | 618.10                         |                            |                                         |
| <b>1-d'-b</b> | 0.2                                        | <b>24.6</b>             | 2.45              | 616.68                         | 3.00                       | 617.33                                  |
| <b>1-d'-c</b> | 0.2                                        | <b>46.5</b>             | 4.85              | 617.19                         |                            |                                         |

## Cartesian coordinates

**1a**

B3LYP/6-31g(d),

el. energy = -2792.857776 a.u.

|   |             |             |             |
|---|-------------|-------------|-------------|
| C | 0.22386300  | -2.61088200 | 1.38925400  |
| C | -0.85931600 | -2.82462700 | -0.96174000 |
| H | -1.31425300 | -2.91474200 | -1.95154900 |
| H | 0.67933700  | -2.52223300 | 2.37924500  |
| C | 1.10555700  | -2.04552500 | 0.27337800  |
| C | 0.51884100  | -2.16142400 | -0.99861000 |
| C | 2.35467700  | -1.46701700 | 0.42130100  |
| C | 1.20062000  | -1.69410600 | -2.11322800 |
| C | 3.04481500  | -0.99145300 | -0.71215400 |
| H | 2.80754300  | -1.37796600 | 1.40737600  |
| C | 2.46539600  | -1.10732700 | -1.98189900 |
| H | 0.75759600  | -1.77928600 | -3.10273100 |
| H | 3.00018200  | -0.74164800 | -2.84672900 |
| C | -1.69877300 | -1.98842000 | 0.00740200  |
| C | -1.11150300 | -1.87238800 | 1.27917300  |
| C | -2.91267300 | -1.38152600 | -0.26565300 |
| C | -1.75679400 | -1.14272900 | 2.26762200  |
| C | -3.56727600 | -0.63975300 | 0.73935500  |
| H | -3.36748900 | -1.47334400 | -1.25006000 |
| C | -2.98483200 | -0.52174400 | 2.00852400  |
| H | -1.31438400 | -1.04902900 | 3.25702900  |
| H | -3.49485100 | 0.04368500  | 2.77536000  |
| C | -0.06514900 | -4.06206900 | 0.99648900  |
| C | -0.65409200 | -4.17741800 | -0.27521500 |
| C | 0.19305600  | -5.19680400 | 1.75527300  |
| C | -0.98276600 | -5.42745900 | -0.78460700 |
| C | -0.13887600 | -6.45793800 | 1.24169200  |
| H | 0.64868000  | -5.10811700 | 2.73889400  |
| C | -0.72229000 | -6.57242100 | -0.01933700 |
| H | -1.43703600 | -5.51723200 | -1.76872100 |
| H | 0.06107000  | -7.34917300 | 1.83055400  |
| H | -0.97645800 | -7.55297400 | -0.41302000 |
| N | 4.31542300  | -0.41598500 | -0.48330600 |
| H | 4.58645000  | -0.34155800 | 0.49128700  |
| N | -4.79606500 | -0.04343500 | 0.38626500  |
| H | -5.14129000 | -0.25976900 | -0.54870800 |
| C | 5.18287500  | 0.14451000  | -1.37653100 |
| C | -5.67326200 | 0.64933800  | 1.17483200  |
| O | -5.50351800 | 0.91448300  | 2.36086500  |
| O | 4.99174600  | 0.21870300  | -2.58750100 |
| C | -6.96464500 | 1.05564900  | 0.41256100  |
| H | -6.68630700 | 1.42821700  | -0.57807600 |
| C | 6.47059700  | 0.69994300  | -0.73362900 |
| H | 6.96513500  | -0.10499900 | -0.17521200 |
| N | -7.81314000 | -0.11798100 | 0.19499000  |
| H | -8.52491600 | -0.34706500 | 0.87501700  |
| N | 7.32569600  | 1.11743200  | -1.82288500 |
| H | 6.92009000  | 1.06848500  | -2.75088700 |
| C | 8.67551400  | 1.19611300  | -1.66933600 |
| C | -7.62822600 | -0.97187200 | -0.84890500 |
| O | -6.71769800 | -0.85614100 | -1.66876500 |
| O | 9.25233900  | 1.07664000  | -0.59385200 |

|   |              |             |             |
|---|--------------|-------------|-------------|
| O | -8.57912000  | -1.92678700 | -0.84183100 |
| O | 9.25901500   | 1.43924600  | -2.86702900 |
| C | 10.71497700  | 1.60623400  | -2.98441500 |
| C | -8.59383300  | -3.00831100 | -1.84628300 |
| C | -7.31039300  | -3.83811400 | -1.74308200 |
| H | -7.38401500  | -4.70901700 | -2.40391600 |
| H | -6.43690900  | -3.25229600 | -2.03323100 |
| H | -7.17093700  | -4.20035400 | -0.71871400 |
| C | -8.79813600  | -2.41690600 | -3.24442800 |
| H | -7.94374300  | -1.80740100 | -3.54278700 |
| H | -8.92381800  | -3.22782300 | -3.97063200 |
| H | -9.70151600  | -1.79764100 | -3.26756900 |
| C | -9.81049700  | -3.83355600 | -1.42018900 |
| H | -9.68124900  | -4.21793600 | -0.40328600 |
| H | -10.71981200 | -3.22452700 | -1.44686400 |
| H | -9.94257500  | -4.68342700 | -2.09774400 |
| C | 10.89806100  | 1.86433600  | -4.48256000 |
| H | 10.52677600  | 1.01738700  | -5.06860600 |
| H | 10.35117600  | 2.76167400  | -4.78972100 |
| H | 11.95900200  | 2.00793400  | -4.71304400 |
| C | 11.17447600  | 2.81739300  | -2.16522200 |
| H | 11.02683200  | 2.64748400  | -1.09763300 |
| H | 12.23848100  | 3.00452700  | -2.34968900 |
| H | 10.61567100  | 3.71147200  | -2.46334700 |
| C | 11.42854200  | 0.31611100  | -2.56528600 |
| H | 12.50224400  | 0.40715200  | -2.76546000 |
| H | 11.28382100  | 0.11590700  | -1.50260900 |
| H | 11.04628400  | -0.53349800 | -3.14192600 |
| C | 6.19596200   | 1.87449000  | 0.26186700  |
| H | 7.14568600   | 2.41288200  | 0.34711600  |
| H | 5.47407300   | 2.56516100  | -0.18970700 |
| C | -7.74136200  | 2.14319900  | 1.17458700  |
| H | -8.74627300  | 2.20034500  | 0.73905800  |
| H | -7.84844900  | 1.82229100  | 2.21640800  |
| C | -7.08922700  | 3.49596100  | 1.11214300  |
| C | -7.34208300  | 4.52725700  | 0.13387400  |
| C | -6.12438900  | 3.98883400  | 1.95593700  |
| C | -6.49471300  | 5.62547000  | 0.45112200  |
| C | -8.20238400  | 4.63725700  | -0.97294000 |
| H | -5.65218200  | 3.50862100  | 2.80068800  |
| N | -5.76702000  | 5.26501800  | 1.56706800  |
| C | -6.48762900  | 6.80657100  | -0.29766200 |
| C | -8.19839600  | 5.80816500  | -1.72069000 |
| H | -8.86310600  | 3.81686600  | -1.24322500 |
| H | -5.07215400  | 5.83620300  | 2.02166500  |
| C | -7.34841400  | 6.88244200  | -1.38678600 |
| H | -5.83308900  | 7.63530700  | -0.03946800 |
| H | -8.85931400  | 5.90057400  | -2.57828200 |
| H | -7.36666700  | 7.78586100  | -1.99022000 |
| C | 5.74719900   | 1.45213900  | 1.63196800  |
| C | 6.55660000   | 0.78277700  | 2.62781500  |
| C | 4.51229400   | 1.64583200  | 2.20635400  |
| C | 5.74381100   | 0.60036600  | 3.77916900  |
| C | 7.89157400   | 0.33712600  | 2.65220800  |
| H | 3.63164000   | 2.12445500  | 1.79881200  |

|   |            |             |            |
|---|------------|-------------|------------|
| N | 4.50002200 | 1.12917600  | 3.48912100 |
| C | 6.22139400 | -0.01604700 | 4.94079200 |
| C | 8.36727300 | -0.27409500 | 3.80557200 |
| H | 8.53368200 | 0.47639300  | 1.78607700 |
| H | 3.72739200 | 1.19498900  | 4.13322000 |
| C | 7.54191100 | -0.45009200 | 4.93583100 |
| H | 5.58770400 | -0.14823300 | 5.81408700 |
| H | 9.39580300 | -0.62242400 | 3.84136800 |
| H | 7.94618600 | -0.93180900 | 5.82201800 |

# 1b

B3LYP/6-31g(d),

el. energy = -2109.285877 a.u.

|   |             |             |             |
|---|-------------|-------------|-------------|
| C | -0.50594500 | 2.65512200  | 1.19631000  |
| C | 0.50596700  | 2.65512100  | -1.19634300 |
| H | 0.93087700  | 2.65532700  | -2.20345900 |
| H | -0.93085500 | 2.65532500  | 2.20342600  |
| C | -1.39777100 | 1.95022000  | 0.17178300  |
| C | -0.84918800 | 1.94894500  | -1.12241400 |
| C | -2.62276900 | 1.35332300  | 0.41626100  |
| C | -1.54201300 | 1.34394200  | -2.16160200 |
| C | -3.32415100 | 0.73951700  | -0.64045800 |
| H | -3.04593800 | 1.35548000  | 1.41934000  |
| C | -2.78181400 | 0.73507200  | -1.93174600 |
| H | -1.12755100 | 1.33747500  | -3.16696500 |
| H | -3.32720100 | 0.26268300  | -2.73642600 |
| C | 1.39779600  | 1.95022500  | -0.17181400 |
| C | 0.84921000  | 1.94895000  | 1.12238200  |
| C | 2.62279900  | 1.35333600  | -0.41629000 |
| C | 1.54203100  | 1.34394500  | 2.16157100  |
| C | 3.32417300  | 0.73952200  | 0.64042900  |
| H | 3.04598000  | 1.35551300  | -1.41936400 |
| C | 2.78183100  | 0.73506900  | 1.93171500  |
| H | 1.12757000  | 1.33748000  | 3.16693400  |
| H | 3.32722000  | 0.26268700  | 2.73639700  |
| C | -0.27488300 | 4.06537200  | 0.64699500  |
| C | 0.27489600  | 4.06537100  | -0.64703100 |
| C | -0.54911700 | 5.26460800  | 1.29261300  |
| C | 0.54912300  | 5.26460600  | -1.29265400 |
| C | -0.27244800 | 6.47451700  | 0.64164500  |
| H | -0.97390000 | 5.26515600  | 2.29379500  |
| C | 0.27244400  | 6.47451600  | -0.64169100 |
| H | 0.97390600  | 5.26515400  | -2.29383500 |
| H | -0.48450200 | 7.41585300  | 1.14149000  |
| H | 0.48449200  | 7.41585200  | -1.14154000 |
| N | -4.56677600 | 0.14942700  | -0.31972100 |
| H | -4.86543800 | 0.23012600  | 0.64530700  |
| N | 4.56678700  | 0.14940600  | 0.31969100  |
| H | 4.86535200  | 0.22991300  | -0.64538300 |
| C | -5.44662100 | -0.49929400 | -1.13618800 |
| C | 5.44673600  | -0.49912300 | 1.13620300  |
| C | 6.69532100  | -1.02197800 | 0.43981500  |
| C | 6.85488800  | -2.57616200 | 0.33847000  |
| C | 8.03866000  | -0.54275600 | 1.02533100  |
| C | 7.59438900  | -1.46974800 | -1.61436200 |
| C | 8.13855600  | -2.42271500 | -0.55391600 |
| C | 9.04825800  | -1.49698200 | 0.32532900  |
| H | 8.03759900  | -0.63725200 | 2.11292400  |
| H | 8.19968700  | 0.50915400  | 0.77439500  |
| H | 9.60898100  | -2.10310200 | 1.04319000  |
| H | 9.78007700  | -0.96394000 | -0.28929000 |

|   |             |             |             |
|---|-------------|-------------|-------------|
| C | -6.69526300 | -1.02204100 | -0.43982000 |
| C | -6.85493000 | -2.57620100 | -0.33837300 |
| C | -8.03854500 | -0.54279000 | -1.02544800 |
| C | -7.59447800 | -1.46959300 | 1.61433900  |
| C | -8.13863000 | -2.42261800 | 0.55393900  |
| C | -9.04823700 | -1.49690500 | -0.32542800 |
| H | -8.03742600 | -0.63737000 | -2.11303300 |
| H | -8.19952800 | 0.50914900  | -0.77460100 |
| H | -9.60895100 | -2.10305300 | -1.04327200 |
| H | -9.78006100 | -0.96377400 | 0.28910900  |
| O | 5.30402400  | -0.69735100 | 2.33971700  |
| O | -5.30381000 | -0.69771100 | -2.33966000 |
| O | -6.72032500 | -0.61764300 | 0.96959300  |
| O | 6.72033200  | -0.61768900 | -0.96962700 |
| O | -7.83844000 | -1.37751000 | 2.78742500  |
| O | 7.83830600  | -1.37775500 | -2.78746300 |
| C | -5.67506000 | -3.25369900 | 0.38026100  |
| H | -5.90260700 | -4.30831600 | 0.56951800  |
| H | -4.77863700 | -3.22065300 | -0.24885100 |
| H | -5.42946600 | -2.78836700 | 1.33931300  |
| C | -7.07594200 | -3.28560900 | -1.68128300 |
| H | -6.19556700 | -3.16163700 | -2.31794100 |
| H | -7.22860800 | -4.35755600 | -1.51132800 |
| H | -7.93674200 | -2.91148300 | -2.23968300 |
| C | -8.81360000 | -3.65695800 | 1.12349000  |
| H | -8.11893400 | -4.25379700 | 1.72321600  |
| H | -9.64320800 | -3.36878000 | 1.77727600  |
| H | -9.21098800 | -4.28920700 | 0.32207500  |
| C | 7.07592200  | -3.28549700 | 1.68141600  |
| H | 6.19558800  | -3.16142900 | 2.31810800  |
| H | 7.22851800  | -4.35746500 | 1.51152400  |
| H | 7.93677500  | -2.91139200 | 2.23974800  |
| C | 5.67494500  | -3.25363400 | -0.38006500 |
| H | 5.90242600  | -4.30827300 | -0.56927700 |
| H | 4.77855700  | -3.22050400 | 0.24909000  |
| H | 5.42932900  | -2.78834100 | -1.33913200 |
| C | 8.81343300  | -3.65713400 | -1.12340500 |
| H | 8.11871800  | -4.25395700 | -1.72308900 |
| H | 9.64305400  | -3.36905100 | -1.77721600 |
| H | 9.21078600  | -4.28936300 | -0.32195600 |

# 1c

B3LYP/6-31g(d),

el. energy = -2451.080504 a.u.

|   |             |            |             |
|---|-------------|------------|-------------|
| C | 0.37173100  | 3.08679100 | -1.24450100 |
| C | -0.37167100 | 3.08679700 | 1.24453200  |
| H | -0.68330700 | 3.08694000 | 2.29227600  |
| H | 0.68336700  | 3.08693000 | -2.29224500 |
| C | 1.37051500  | 2.38193200 | -0.32386100 |
| C | 0.96730900  | 2.38092600 | 1.02247900  |
| C | 2.56135500  | 1.78479800 | -0.70095500 |
| C | 1.77015000  | 1.77593000 | 1.97903600  |
| C | 3.37454300  | 1.17078300 | 0.27205500  |
| H | 2.87075500  | 1.78704600 | -1.74487200 |
| C | 2.97729400  | 1.16711900 | 1.61477700  |
| H | 1.46853400  | 1.76845000 | 3.02377600  |
| H | 3.60378900  | 0.69100900 | 2.35538900  |
| C | -1.37038200 | 2.38180300 | 0.32391500  |
| C | -0.96717400 | 2.38078700 | -1.02242500 |
| C | -2.56116200 | 1.78456000 | 0.70102800  |
| C | -1.76995000 | 1.77567300 | -1.97896400 |

|   |              |             |             |
|---|--------------|-------------|-------------|
| C | -3.37428400  | 1.17043100  | -0.27196500 |
| H | -2.87056700  | 1.78681400  | 1.74494300  |
| C | -2.97702900  | 1.16674900  | -1.61468500 |
| H | -1.46832700  | 1.76818200  | -3.02370100 |
| H | -3.60347600  | 0.69053600  | -2.35527400 |
| C | 0.20222600   | 4.49712000  | -0.67328900 |
| C | -0.20231600  | 4.49712200  | 0.67327200  |
| C | 0.40356500   | 5.69637400  | -1.34514200 |
| C | -0.40378100  | 5.69637700  | 1.34508600  |
| C | 0.19998600   | 6.90632400  | -0.66780000 |
| H | 0.71546700   | 5.69699600  | -2.38704500 |
| C | -0.20032900  | 6.90632600  | 0.66770300  |
| H | -0.71568300  | 5.69700100  | 2.38698900  |
| H | 0.35555500   | 7.84766500  | -1.18795900 |
| H | -0.35599700  | 7.84766800  | 1.18783100  |
| N | 4.57943900   | 0.58788600  | -0.18335100 |
| H | 4.73274000   | 0.63638500  | -1.18373300 |
| N | -4.57910600  | 0.58739800  | 0.18344600  |
| H | -4.73238500  | 0.63578300  | 1.18383700  |
| C | 5.51762400   | -0.11150300 | 0.51746100  |
| C | -5.51744800  | -0.11166800 | -0.51746900 |
| O | -5.45739400  | -0.36730900 | -1.71531500 |
| O | 5.45750300   | -0.36742900 | 1.71523700  |
| C | -6.74508200  | -0.54340000 | 0.33326900  |
| H | -7.32034000  | 0.36824200  | 0.55309500  |
| C | -6.34224900  | -1.16713400 | 1.66516000  |
| C | -6.54716600  | -0.47086800 | 2.86115400  |
| C | -5.73170100  | -2.42792000 | 1.70733500  |
| C | -6.13830100  | -1.01712700 | 4.08110200  |
| H | -7.05573300  | 0.49066100  | 2.84110400  |
| C | -5.32807000  | -2.97534800 | 2.92310000  |
| H | -5.58692500  | -2.98125200 | 0.78331200  |
| C | -5.52630600  | -2.26941400 | 4.11380800  |
| H | -6.31323600  | -0.46939100 | 5.00324200  |
| H | -4.85744900  | -3.95470300 | 2.94361200  |
| H | -5.21217900  | -2.69924800 | 5.06106100  |
| C | 6.74519300   | -0.54327500 | -0.33335600 |
| H | 7.32045500   | 0.36833100  | -0.55330900 |
| C | 6.34216300   | -1.16708800 | -1.66515600 |
| C | 6.54690100   | -0.47087600 | -2.86121700 |
| C | 5.73161100   | -2.42787200 | -1.70718400 |
| C | 6.13785100   | -1.01718300 | -4.08107500 |
| H | 7.05548300   | 0.49065000  | -2.84129000 |
| C | 5.32779400   | -2.97535200 | -2.92286800 |
| H | 5.58697200   | -2.98117000 | -0.78312000 |
| C | 5.52584400   | -2.26947400 | -4.11363400 |
| H | 6.31265000   | -0.46949300 | -5.00326800 |
| H | 4.85716600   | -3.95470700 | -2.94325400 |
| H | 5.21157200   | -2.69934300 | -5.06082200 |
| N | -7.53520600  | -1.42164900 | -0.50205800 |
| H | -7.18347800  | -1.54835400 | -1.44574600 |
| N | 7.53533100   | -1.42145200 | 0.50198800  |
| H | 7.18350000   | -1.54848100 | 1.44558500  |
| C | 8.88458800   | -1.52554500 | 0.28583600  |
| C | -8.88450700  | -1.52549600 | -0.28596100 |
| O | -9.45260400  | -1.07536400 | 0.69662800  |
| O | 9.45276800   | -1.07539300 | -0.69668900 |
| O | -9.45180800  | -2.20613600 | -1.30996500 |
| O | 9.45177400   | -2.20645700 | 1.30974000  |
| C | 10.89359400  | -2.49552600 | 1.31997200  |
| C | -10.89360800 | -2.49540900 | -1.32004100 |

|   |              |             |             |
|---|--------------|-------------|-------------|
| C | -11.69297100 | -1.18793700 | -1.35067400 |
| H | -12.75867700 | -1.41073000 | -1.47636000 |
| H | -11.55783600 | -0.62412700 | -0.42642800 |
| H | -11.37392500 | -0.56739000 | -2.19550200 |
| C | -11.26147900 | -3.37348200 | -0.11904500 |
| H | -11.11641300 | -2.83519000 | 0.81886100  |
| H | -12.31158800 | -3.67828100 | -0.19357000 |
| H | -10.64453900 | -4.27881400 | -0.10755300 |
| C | -11.06718800 | -3.26751100 | -2.63073000 |
| H | -10.76030900 | -2.65416800 | -3.48418400 |
| H | -10.46031700 | -4.17872300 | -2.62554700 |
| H | -12.11673400 | -3.54972900 | -2.76537000 |
| C | 11.06713900  | -3.26771500 | 2.63061900  |
| H | 10.76016600  | -2.65445800 | 3.48410200  |
| H | 10.46032000  | -4.17896200 | 2.62532400  |
| H | 12.11669100  | -3.54988300 | 2.76530700  |
| C | 11.26169000  | -3.37345000 | 0.11893100  |
| H | 11.11656100  | -2.83510300 | -0.81893600 |
| H | 12.31185200  | -3.67806100 | 0.19346800  |
| H | 10.64491100  | -4.27889000 | 0.10734100  |
| C | 11.69281200  | -1.18797000 | 1.35079200  |
| H | 12.75851500  | -1.41066800 | 1.47666400  |
| H | 11.55779500  | -0.62412300 | 0.42655100  |
| H | 11.37355700  | -0.56748900 | 2.19559000  |

# 1e

B3LYP/6-31g(d),

el. energy = -1799.131574 a.u.

|   |             |             |             |
|---|-------------|-------------|-------------|
| C | -0.34508600 | 1.57702300  | 1.25158200  |
| C | 0.34509900  | 1.57648200  | -1.25201100 |
| H | 0.63574900  | 1.57508800  | -2.30542400 |
| H | -0.63573300 | 1.57608500  | 2.30499600  |
| C | -1.36463000 | 0.87094200  | 0.35409300  |
| C | -0.98848200 | 0.87139100  | -0.99928600 |
| C | -2.54588200 | 0.27946300  | 0.77927700  |
| C | -1.81217000 | 0.26790400  | -1.94040800 |
| C | -3.37610100 | -0.33084800 | -0.17918200 |
| H | -2.83902300 | 0.28344800  | 1.82045500  |
| C | -3.00489200 | -0.33272600 | -1.52989600 |
| H | -1.53778700 | 0.25819000  | -2.99227100 |
| H | -3.65099800 | -0.80623500 | -2.26609600 |
| C | 1.36463400  | 0.87076900  | -0.35421800 |
| C | 0.98848900  | 0.87180700  | 0.99916000  |
| C | 2.54587700  | 0.27909100  | -0.77915300 |
| C | 1.81217500  | 0.26872100  | 1.94054200  |
| C | 3.37608100  | -0.33083100 | 0.17956600  |
| H | 2.83901500  | 0.28261200  | -1.82033200 |
| C | 3.00488000  | -0.33211400 | 1.53028400  |
| H | 1.53779800  | 0.25947300  | 2.99241000  |
| H | 3.65098200  | -0.80531400 | 2.26668600  |
| C | -0.18819700 | 2.98734400  | 0.67665900  |
| C | 0.18823300  | 2.98705100  | -0.67769200 |
| C | -0.37698500 | 4.18648800  | 1.35238200  |
| C | 0.37703800  | 4.18590400  | -1.35392700 |
| C | -0.18722100 | 5.39611200  | 0.67050200  |
| H | -0.66972700 | 4.18696300  | 2.39975200  |
| C | 0.18729400  | 5.39582300  | -0.67256300 |
| H | 0.66977500  | 4.18592700  | -2.40129900 |
| H | -0.33332400 | 6.33761600  | 1.19316100  |
| H | 0.33341400  | 6.33710000  | -1.19562400 |
| N | -4.59502500 | -0.96735300 | 0.15574100  |

|   |             |             |             |
|---|-------------|-------------|-------------|
| H | -5.11974500 | -1.33834500 | -0.62802500 |
| N | 4.59502100  | -0.96745700 | -0.15507500 |
| H | 5.11989000  | -1.33784100 | 0.62887900  |
| C | -5.20543200 | -1.07859000 | 1.36440000  |
| C | 5.20512200  | -1.07978100 | -1.36378400 |
| O | 4.79040900  | -0.60981100 | -2.42210800 |
| O | -4.79096700 | -0.60769400 | 2.42240700  |
| C | 6.50555500  | -1.93832200 | -1.39720800 |
| H | 6.16729600  | -2.99017500 | -1.35132500 |
| C | 7.42818900  | -1.68187300 | -0.22031500 |
| C | 7.39734800  | -2.51564100 | 0.90445500  |
| C | 8.30124400  | -0.58643400 | -0.23289200 |
| C | 8.20890200  | -2.24822900 | 2.01078300  |
| H | 6.75322800  | -3.39366100 | 0.90698900  |
| C | 9.11563300  | -0.32417500 | 0.86681300  |
| H | 8.34508800  | 0.03888400  | -1.11884700 |
| C | 9.06812500  | -1.14998000 | 1.99426000  |
| H | 8.17942100  | -2.90719100 | 2.87446900  |
| H | 9.79224300  | 0.52606000  | 0.84525000  |
| H | 9.70581000  | -0.94312700 | 2.84940000  |
| C | -6.50587000 | -1.93709900 | 1.39826200  |
| H | -6.16760900 | -2.98899500 | 1.35343100  |
| C | -7.42818800 | -1.68172000 | 0.22088700  |
| C | -7.39701200 | -2.51647900 | -0.90313200 |
| C | -8.30126700 | -0.58627900 | 0.23225000  |
| C | -8.20826300 | -2.25006100 | -2.00992700 |
| H | -6.75287800 | -3.39449100 | -0.90471300 |
| C | -9.11535000 | -0.32501200 | -0.86791400 |
| H | -8.34537000 | 0.03980900  | 1.11764800  |
| C | -9.06750600 | -1.15181400 | -1.99462000 |
| H | -8.17852000 | -2.90978800 | -2.87302000 |
| H | -9.79198300 | 0.52522900  | -0.84730000 |
| H | -9.70495100 | -0.94572200 | -2.85012300 |
| O | -7.14991100 | -1.67667300 | 2.61929400  |
| H | -6.46420600 | -1.24272600 | 3.16968100  |
| O | 7.14927600  | -1.67900600 | -2.61864200 |
| H | 6.46342300  | -1.24557400 | -3.16925500 |

#### 1d-a

B3LYP/6-31g(d),

el. energy = -2042.302472 a.u.

|   |             |             |             |
|---|-------------|-------------|-------------|
| C | -0.36853100 | 2.89795100  | 1.23450700  |
| C | 0.67358800  | 2.29051400  | -1.06520200 |
| H | 1.11240700  | 2.03441000  | -2.03262300 |
| H | -0.80548200 | 3.15398100  | 2.20356200  |
| C | -1.28603100 | 2.02261800  | 0.37767200  |
| C | -0.72052000 | 1.69267300  | -0.86538400 |
| C | -2.54715900 | 1.56571600  | 0.72168500  |
| C | -1.43488400 | 0.89975000  | -1.75242000 |
| C | -3.27109100 | 0.76180800  | -0.18118500 |
| H | -2.98136300 | 1.82471200  | 1.68619700  |
| C | -2.71084400 | 0.42834400  | -1.42043800 |
| H | -1.00856100 | 0.63555000  | -2.71731800 |
| H | -3.27028300 | -0.18895300 | -2.10936000 |
| C | 1.51302800  | 1.79751700  | 0.11644900  |
| C | 0.94609600  | 2.12560300  | 1.35899700  |
| C | 2.70852300  | 1.09899700  | 0.02446700  |
| C | 1.59211100  | 1.74389400  | 2.52697700  |
| C | 3.35954200  | 0.71352700  | 1.21162900  |
| H | 3.14437900  | 0.84660200  | -0.93302600 |
| C | 2.79637300  | 1.03918200  | 2.45309000  |

|   |              |             |             |
|---|--------------|-------------|-------------|
| H | 1.17089300   | 1.98832400  | 3.49923000  |
| H | 3.30291700   | 0.74068100  | 3.36860400  |
| C | -0.05190300  | 4.12894500  | 0.38110200  |
| C | 0.51528800   | 3.79967500  | -0.86276400 |
| C | -0.26739300  | 5.45767000  | 0.72465600  |
| C | 0.86640500   | 4.80106300  | -1.75947200 |
| C | 0.08642000   | 6.46796400  | -0.18017500 |
| H | -0.70592100  | 5.71237000  | 1.68693800  |
| C | 0.64917600   | 6.14178900  | -1.41329200 |
| H | 1.30598700   | 4.54712300  | -2.72122500 |
| H | -0.07936300  | 7.50934700  | 0.08285100  |
| H | 0.92173900   | 6.92918100  | -2.11101600 |
| N | -4.54827700  | 0.33153700  | 0.23421300  |
| H | -4.85406500  | 0.64081600  | 1.14666500  |
| N | 4.57690700   | 0.00238600  | 1.22239400  |
| H | 4.95339800   | -0.23346300 | 2.13041200  |
| C | -5.45987000  | -0.43109500 | -0.45171500 |
| C | 5.32071300   | -0.43992100 | 0.15708800  |
| O | 5.05991800   | -0.29511100 | -1.02317900 |
| O | -5.32736200  | -0.89401200 | -1.56953200 |
| O | -6.55780100  | -0.59727800 | 0.33749700  |
| O | 6.42425900   | -1.07427000 | 0.64071100  |
| C | -7.67011100  | -1.33414400 | -0.23962000 |
| C | -8.42297600  | -2.08001000 | 0.87930900  |
| C | -8.55045000  | -0.34393200 | -1.00799300 |
| H | -7.24655800  | -2.06404200 | -0.93780000 |
| C | -9.65132600  | -2.75932500 | 0.22687000  |
| H | -8.80474500  | -1.32717100 | 1.58728200  |
| C | -9.78372000  | -1.01823600 | -1.62847400 |
| H | -8.87230200  | 0.44807600  | -0.31596200 |
| H | -7.94309500  | 0.13210700  | -1.78665200 |
| C | -10.55048600 | -1.77549200 | -0.53515200 |
| H | -10.24267400 | -3.26363700 | 0.99725000  |
| H | -9.30908400  | -3.54445200 | -0.46417300 |
| H | -9.42861300  | -1.75831600 | -2.36314200 |
| H | -11.39985000 | -2.31549700 | -0.97435400 |
| H | -10.97703100 | -1.04776500 | 0.17241100  |
| C | 7.31831600   | -1.66833500 | -0.34005100 |
| C | 8.76310300   | -1.62397000 | 0.19431400  |
| C | 6.82476000   | -3.08715000 | -0.63792800 |
| H | 7.25106800   | -1.05999300 | -1.24827800 |
| C | 9.65268100   | -2.35508000 | -0.83985500 |
| H | 8.79540900   | -2.21212400 | 1.12529700  |
| C | 7.72828400   | -3.82074400 | -1.64120000 |
| H | 6.78828800   | -3.65049800 | 0.30600300  |
| H | 5.79902800   | -3.02751400 | -1.02033900 |
| C | 9.17847500   | -3.78442700 | -1.13823300 |
| H | 10.68468100  | -2.38720200 | -0.47725600 |
| H | 9.67150200   | -1.77807200 | -1.77672100 |
| H | 7.68982700   | -3.26941600 | -2.59416800 |
| H | 9.84583800   | -4.24863100 | -1.87649400 |
| H | 9.25556700   | -4.39261300 | -0.22372800 |
| C | -7.50170800  | -3.06523800 | 1.67253100  |
| H | -6.75016200  | -3.44914000 | 0.96587700  |
| C | -6.75671400  | -2.35610700 | 2.81871700  |
| H | -6.17900200  | -1.50152200 | 2.46359200  |
| H | -7.46942700  | -1.99362900 | 3.57175900  |
| H | -6.07175400  | -3.04951700 | 3.32141400  |
| C | -8.23801400  | -4.28612700 | 2.25366800  |
| H | -9.02755400  | -3.98371600 | 2.95395200  |
| H | -8.69392900  | -4.91372900 | 1.48203500  |

|   |              |             |             |
|---|--------------|-------------|-------------|
| H | -7.53197600  | -4.91264600 | 2.81110400  |
| C | -10.66907700 | -0.00704100 | -2.36505000 |
| H | -10.11203000 | 0.50783900  | -3.15663100 |
| H | -11.53244800 | -0.49986500 | -2.82782700 |
| H | -11.05120600 | 0.75646000  | -1.67512300 |
| C | 9.23851100   | -0.17026100 | 0.52501400  |
| H | 8.73452300   | 0.50649700  | -0.18178500 |
| C | 8.84000100   | 0.25123200  | 1.95159000  |
| H | 9.12481300   | 1.29326600  | 2.14050300  |
| H | 7.76675300   | 0.15358000  | 2.12180200  |
| H | 9.35826200   | -0.37132100 | 2.69335600  |
| C | 10.75288600  | 0.05139400  | 0.35767300  |
| H | 11.33121400  | -0.60920700 | 1.01668100  |
| H | 11.09516300  | -0.11236800 | -0.66863700 |
| H | 11.00734100  | 1.08298000  | 0.62752900  |
| C | 7.23913000   | -5.24977800 | -1.90092000 |
| H | 6.21069400   | -5.25604700 | -2.28075300 |
| H | 7.87266600   | -5.75726600 | -2.63814200 |
| H | 7.25800900   | -5.84512600 | -0.97889600 |

# 1d-b

B3LYP/6-31g(d),

el. energy = -2042.302881 a.u.

|   |             |             |             |
|---|-------------|-------------|-------------|
| C | -0.68872400 | 2.26185000  | 1.10052400  |
| C | 0.68874600  | 2.26180000  | -1.10057400 |
| H | 1.26841000  | 2.26090600  | -2.02707200 |
| H | -1.26838800 | 2.26100100  | 2.02702300  |
| C | -1.41013100 | 1.55701100  | -0.05132100 |
| C | -0.66163900 | 1.55660600  | -1.23972500 |
| C | -2.66408900 | 0.96679300  | 0.01949400  |
| C | -1.18293500 | 0.95029700  | -2.37468800 |
| C | -3.18830700 | 0.35384900  | -1.13412700 |
| H | -3.23983400 | 0.96840400  | 0.93547500  |
| C | -2.44368300 | 0.35025600  | -2.32147200 |
| H | -0.61967600 | 0.93753900  | -3.30460500 |
| H | -2.85227600 | -0.12425000 | -3.21131700 |
| C | 1.41020900  | 1.55713000  | 0.05134000  |
| C | 0.66171800  | 1.55678100  | 1.23974500  |
| C | 2.66421800  | 0.96701100  | -0.01941800 |
| C | 1.18306500  | 0.95062400  | 2.37476500  |
| C | 3.18848100  | 0.35421100  | 1.13425900  |
| H | 3.23995400  | 0.96856400  | -0.93540400 |
| C | 2.44385700  | 0.35067000  | 2.32160400  |
| H | 0.61980600  | 0.93790800  | 3.30468300  |
| H | 2.85248400  | -0.12372500 | 3.21149200  |
| C | -0.37440600 | 3.67225000  | 0.59497600  |
| C | 0.37431300  | 3.67222300  | -0.59516200 |
| C | -0.74884200 | 4.87154900  | 1.18794500  |
| C | 0.74865200  | 4.87149600  | -1.18824400 |
| C | -0.37192900 | 6.08164800  | 0.58947900  |
| H | -1.32939300 | 4.87168400  | 2.10763400  |
| C | 0.37164100  | 6.08162200  | -0.58989300 |
| H | 1.32920300  | 4.87159100  | -2.10793300 |
| H | -0.66179700 | 7.02307200  | 1.04869200  |
| H | 0.66143400  | 7.02302500  | -1.04919500 |
| N | -4.45228200 | -0.27112800 | -1.16366000 |
| H | -4.72807000 | -0.68852100 | -2.04206600 |
| N | 4.45252800  | -0.27061300 | 1.16386400  |
| H | 4.72840900  | -0.68779100 | 2.04234400  |
| C | -5.36556100 | -0.40636900 | -0.14877700 |
| C | 5.36559400  | -0.40635100 | 0.14885200  |

|   |              |             |             |
|---|--------------|-------------|-------------|
| O | 5.24876800   | -0.00538800 | -0.99485900 |
| O | -5.24894500  | -0.00491000 | 0.99478100  |
| O | -6.45065700  | -1.07028000 | -0.63553100 |
| O | 6.45076300   | -1.07006800 | 0.63569900  |
| C | -7.51819700  | -1.35632900 | 0.30874000  |
| C | -8.86838000  | -1.36003600 | -0.43424100 |
| C | -7.20293000  | -2.68638500 | 0.99938600  |
| H | -7.51733900  | -0.55064200 | 1.05067300  |
| C | -9.95214300  | -1.76284400 | 0.59456600  |
| H | -8.83070900  | -2.15531100 | -1.19570300 |
| C | -8.29628900  | -3.09880400 | 1.99717700  |
| H | -7.09416000  | -3.46377600 | 0.22895600  |
| H | -6.23609600  | -2.59566200 | 1.50812800  |
| C | -9.65725900  | -3.10128200 | 1.28644100  |
| H | -10.92514800 | -1.82219800 | 0.09727500  |
| H | -10.04178300 | -0.97440000 | 1.35704200  |
| H | -8.33343800  | -2.33488600 | 2.79006700  |
| H | -10.45698600 | -3.33097000 | 2.00309600  |
| H | -9.66893300  | -3.90888800 | 0.53825100  |
| C | 7.51811500   | -1.35662900 | -0.30863400 |
| C | 8.86851200   | -1.35964300 | 0.43397100  |
| C | 7.20274000   | -2.68722600 | -0.99819900 |
| H | 7.51694500   | -0.55148900 | -1.05115600 |
| C | 9.95200600   | -1.76333400 | -0.59479200 |
| H | 8.83107900   | -2.15422000 | 1.19617600  |
| C | 8.29583400   | -3.10040000 | -1.99595600 |
| H | 7.09418500   | -3.46402900 | -0.22714600 |
| H | 6.23575900   | -2.59691400 | -1.50674400 |
| C | 9.65696300   | -3.10231900 | -1.28553100 |
| H | 10.92512800  | -1.82231300 | -0.09769200 |
| H | 10.04148000  | -0.97549700 | -1.35791700 |
| H | 8.33278900   | -2.33709000 | -2.78944100 |
| H | 10.45653400  | -3.33257200 | -2.00217900 |
| H | 9.66880300   | -3.90933000 | -0.53670400 |
| C | -9.15771900  | -0.00648100 | -1.16439700 |
| H | -8.69003400  | 0.79214000  | -0.56856400 |
| C | -8.53664200  | 0.02695300  | -2.57314800 |
| H | -7.46453500  | -0.17421900 | -2.55160900 |
| H | -9.00940100  | -0.72632800 | -3.21769800 |
| H | -8.69370500  | 1.00587700  | -3.04184200 |
| C | -10.65332900 | 0.33858200  | -1.28380400 |
| H | -11.19903400 | -0.42816300 | -1.84899700 |
| H | -11.14177600 | 0.45220900  | -0.31128600 |
| H | -10.77212200 | 1.28556300  | -1.82312300 |
| C | -7.98150500  | -4.44744900 | 2.65368800  |
| H | -7.01781100  | -4.42108000 | 3.17585400  |
| H | -8.75201500  | -4.72178400 | 3.38410100  |
| H | -7.93291900  | -5.24763100 | 1.90384000  |
| C | 9.15814400   | -0.00543200 | 1.16278200  |
| H | 8.69082200   | 0.79272100  | 0.56603100  |
| C | 8.53692900   | 0.02974000  | 2.57143300  |
| H | 8.69453500   | 1.00903600  | 3.03916600  |
| H | 7.46471000   | -0.17080800 | 2.55001200  |
| H | 9.00918500   | -0.72317700 | 3.21677700  |
| C | 10.65386900  | 0.33920600  | 1.28202900  |
| H | 11.19923300  | -0.42723700 | 1.84796400  |
| H | 11.14245300  | 0.45178400  | 0.30946100  |
| H | 10.77295400  | 1.28662600  | 1.82051200  |
| C | 7.98089200   | -4.44954900 | -2.65135200 |
| H | 7.01707600   | -4.42358200 | -3.17331300 |
| H | 8.75122900   | -4.72445000 | -3.38173400 |

|   |            |             |             |
|---|------------|-------------|-------------|
| H | 7.93248100 | -5.24915200 | -1.90087500 |
|---|------------|-------------|-------------|

**1d-c**  
B3LYP/6-31g(d),  
el. energy = -2042.302338 a.u.

|   |              |             |             |
|---|--------------|-------------|-------------|
| C | -0.35183200  | 2.79262800  | 1.24999100  |
| C | 0.35183000   | 2.79264600  | -1.25001600 |
| H | 0.64662500   | 2.79317000  | -2.30275100 |
| H | -0.64662400  | 2.79312900  | 2.30272700  |
| C | -1.36563400  | 2.08791400  | 0.34552200  |
| C | -0.98383400  | 2.08714500  | -1.00667300 |
| C | -2.54976400  | 1.49001800  | 0.74271500  |
| C | -1.80333600  | 1.48161400  | -1.94865500 |
| C | -3.37990500  | 0.87454200  | -0.21535300 |
| H | -2.84115700  | 1.49207400  | 1.79190900  |
| C | -3.00364900  | 0.87190600  | -1.56421700 |
| H | -1.52012900  | 1.47437200  | -2.99870400 |
| H | -3.64455900  | 0.39925900  | -2.29527000 |
| C | 1.36550400   | 2.08768400  | -0.34559500 |
| C | 0.98370800   | 2.08690500  | 1.00660000  |
| C | 2.54952800   | 1.48959800  | -0.74282100 |
| C | 1.80309800   | 1.48117200  | 1.94854800  |
| C | 3.37954400   | 0.87389500  | 0.21520700  |
| H | 2.84093900   | 1.49169200  | -1.79201000 |
| C | 3.00328200   | 0.87123600  | 1.56407000  |
| H | 1.51988600   | 1.47391900  | 2.99859600  |
| H | 3.64410000   | 0.39842000  | 2.29509500  |
| C | -0.19187500  | 4.20296400  | 0.67645200  |
| C | 0.19212400   | 4.20297300  | -0.67638100 |
| C | -0.38292000  | 5.40238700  | 1.35091300  |
| C | 0.38337500   | 5.40240600  | -1.35076700 |
| C | -0.18964900  | 6.61259800  | 0.67078100  |
| H | -0.67895300  | 5.40293100  | 2.39749800  |
| C | 0.19031500   | 6.61260800  | -0.67055800 |
| H | 0.67940600   | 5.40296400  | -2.39735300 |
| H | -0.33728300  | 7.55394600  | 1.19340000  |
| H | 0.33811100   | 7.55396200  | -1.19311800 |
| N | -4.56775300  | 0.28196500  | 0.25959700  |
| H | -4.73804300  | 0.34563600  | 1.25394900  |
| N | 4.56722900   | 0.28102800  | -0.25979600 |
| H | 4.73726200   | 0.34426700  | -1.25421900 |
| C | -5.54725400  | -0.36301600 | -0.45348000 |
| C | 5.54711000   | -0.36328100 | 0.45337400  |
| O | 5.57266000   | -0.54165400 | 1.65711000  |
| O | -5.57252100  | -0.54190600 | -1.65714400 |
| O | -6.50288600  | -0.78579400 | 0.41977800  |
| O | 6.50270000   | -0.78613100 | -0.41988700 |
| C | -7.66212800  | -1.45130100 | -0.15205400 |
| C | -8.18770100  | -2.50511500 | 0.84212900  |
| C | -8.69855000  | -0.38106800 | -0.50681900 |
| H | -7.32778100  | -1.95328100 | -1.06620100 |
| C | -9.47491200  | -3.10684200 | 0.22832500  |
| H | -8.48145600  | -1.97983700 | 1.76490900  |
| C | -9.98671900  | -0.98528800 | -1.08694000 |
| H | -8.93628300  | 0.19095800  | 0.40201200  |
| H | -8.24860200  | 0.31779900  | -1.22179500 |
| C | -10.52924100 | -2.04645800 | -0.11903300 |
| H | -9.90910100  | -3.83030600 | 0.92513200  |
| H | -9.21597300  | -3.66985900 | -0.68108400 |
| H | -9.72560100  | -1.49286700 | -2.02915800 |
| H | -11.41459500 | -2.53283500 | -0.54972000 |

|   |              |             |            |
|---|--------------|-------------|------------|
| H | -10.86551600 | -1.55021800 | 0.80445800 |
|---|--------------|-------------|------------|

|   |              |             |             |
|---|--------------|-------------|-------------|
| C | 7.66210400   | -1.45133400 | 0.15199900  |
| C | 8.18779800   | -2.50525100 | -0.84199800 |
| C | 8.69835700   | -0.38084600 | 0.50650500  |
| H | 7.32790800   | -1.95320100 | 1.06626600  |
| C | 9.47514400   | -3.10662700 | -0.22810900 |
| H | 8.48143200   | -1.98013200 | -1.76491000 |
| C | 9.98663800   | -0.98472500 | 1.08672300  |
| H | 8.93596800   | 0.19102700  | -0.40245400 |
| H | 8.24830000   | 0.31808500  | 1.22134400  |
| C | 10.52930700  | -2.04600500 | 0.11902000  |
| H | 9.90944800   | -3.83014300 | -0.92479000 |
| H | 9.21631700   | -3.66952200 | 0.68140800  |
| H | 9.72562400   | -1.49215100 | 2.02905300  |
| H | 11.41474500  | -2.53216300 | 0.54978100  |
| H | 10.86548200  | -1.54989700 | -0.80457900 |
| C | -7.10624500  | -3.57204000 | 1.21735200  |
| H | -6.46254900  | -3.70843500 | 0.33493400  |
| C | -6.21838600  | -3.10158900 | 2.38440300  |
| H | -5.74561000  | -2.14049100 | 2.17687500  |
| H | -6.81529800  | -2.99434200 | 3.30014000  |
| H | -5.42981300  | -3.83536800 | 2.59013200  |
| C | -7.68254800  | -4.95500400 | 1.57184400  |
| H | -8.36034800  | -4.89915500 | 2.43361800  |
| H | -8.22933400  | -5.41245200 | 0.74178500  |
| H | -6.86779900  | -5.63640500 | 1.84309100  |
| C | -11.02477100 | 0.09672400  | -1.40402800 |
| H | -10.62888000 | 0.83300100  | -2.11339300 |
| H | -11.93002800 | -0.33958200 | -1.84285300 |
| H | -11.32131300 | 0.63531900  | -0.49468200 |
| C | 7.10655200   | -3.57247500 | -1.21695700 |
| H | 6.46306100   | -3.70899300 | -0.33440400 |
| C | 6.21833500   | -3.10235900 | -2.38386600 |
| H | 5.42991600   | -3.83636800 | -2.58936400 |
| H | 5.74535200   | -2.14136800 | -2.17633100 |
| H | 6.81503400   | -2.99504400 | -3.29973400 |
| C | 7.68315800   | -4.95530600 | -1.57148200 |
| H | 8.36083600   | -4.89929600 | -2.43334200 |
| H | 8.23016000   | -5.41260000 | -0.74148200 |
| H | 6.86854600   | -5.63691600 | -1.84261700 |
| C | 11.02452000  | 0.09751900  | 1.40356300  |
| H | 10.62852700  | 0.83387300  | 2.11279000  |
| H | 11.92986000  | -0.33855200 | 1.84245200  |
| H | 11.32095400  | 0.63598000  | 0.49410200  |

**1d'-a**

B3LYP/6-31g(d),

el. energy = -2042.302321 a.u.

|   |             |            |             |
|---|-------------|------------|-------------|
| C | 0.37216400  | 2.66625300 | 1.24394400  |
| C | -0.37217700 | 2.66627200 | -1.24426800 |
| H | -0.68408700 | 2.66682600 | -2.29205900 |
| H | 0.68407400  | 2.66679200 | 2.29173500  |
| C | 1.37107500  | 1.96154800 | 0.32309300  |
| C | 0.96722300  | 1.96071600 | -1.02268400 |
| C | 2.56192900  | 1.36436700 | 0.70081400  |
| C | 1.77171700  | 1.35600100 | -1.97802100 |
| C | 3.37686300  | 0.74982200 | -0.27080900 |
| H | 2.87077300  | 1.36715000 | 1.74500300  |
| C | 2.97900200  | 0.74785300 | -1.61346700 |
| H | 1.47152600  | 1.34893800 | -3.02334600 |
| H | 3.60784500  | 0.27512600 | -2.35485900 |

|   |              |             |             |
|---|--------------|-------------|-------------|
| C | -1.37122600  | 1.96180100  | -0.32338300 |
| C | -0.96736800  | 1.96093800  | 1.02239200  |
| C | -2.56219800  | 1.36483900  | -0.70107600 |
| C | -1.77197200  | 1.35641600  | 1.97776000  |
| C | -3.37723000  | 0.75047500  | 0.27057900  |
| H | -2.87105800  | 1.36765800  | -1.74526000 |
| C | -2.97937600  | 0.74849100  | 1.61323400  |
| H | -1.47178000  | 1.34933700  | 3.02308500  |
| H | -3.60831600  | 0.27591400  | 2.35464600  |
| C | 0.20315000   | 4.07663300  | 0.67299400  |
| C | -0.20290000  | 4.07664400  | -0.67337900 |
| C | 0.40545300   | 5.27603900  | 1.34418500  |
| C | -0.40497900  | 5.27606000  | -1.34461900 |
| C | 0.20129500   | 6.48624100  | 0.66722500  |
| H | 0.71861400   | 5.27658300  | 2.38577000  |
| C | -0.20059500  | 6.48625200  | -0.66770700 |
| H | -0.71813900  | 5.27662200  | -2.38620400 |
| H | 0.35765200   | 7.42758700  | 1.18729900  |
| H | -0.35677900  | 7.42760500  | -1.18782000 |
| N | 4.57516100   | 0.16226800  | 0.18382100  |
| H | 4.75860800   | 0.22048100  | 1.17616900  |
| N | -4.57568500  | 0.16318200  | -0.18395600 |
| H | -4.75896400  | 0.22098000  | -1.17636000 |
| C | 5.52469400   | -0.51490500 | -0.53987400 |
| C | -5.52489500  | -0.51442000 | 0.53975500  |
| O | -5.50793500  | -0.73270900 | 1.73706200  |
| O | 5.50786900   | -0.73324000 | -1.73717600 |
| O | -6.51296200  | -0.90549900 | -0.31191200 |
| C | -7.59159300  | -1.69578400 | 0.25897800  |
| C | -8.89831300  | -1.40261500 | -0.50366100 |
| C | -7.17888200  | -3.16985300 | 0.21127900  |
| H | -7.70467900  | -1.38172200 | 1.30207900  |
| C | -9.98373500  | -2.34092800 | 0.07711700  |
| H | -8.74593200  | -1.69253400 | -1.55554700 |
| C | -9.28785800  | 0.11254900  | -0.47220600 |
| C | -8.27164700  | -4.10014500 | 0.76023100  |
| H | -6.95658500  | -3.43751900 | -0.83210600 |
| H | -6.25111000  | -3.29175500 | 0.78251800  |
| C | -9.58980200  | -3.82374900 | 0.02318700  |
| H | -10.92123200 | -2.19826500 | -0.46901400 |
| H | -10.18775900 | -2.05943200 | 1.12125000  |
| H | -8.93765300  | 0.51954400  | 0.48869100  |
| C | -8.60152400  | 0.90386300  | -1.60110300 |
| C | -10.80313500 | 0.37487000  | -0.54654100 |
| H | -8.42279500  | -3.85124000 | 1.82268400  |
| C | -7.85517000  | -5.57253100 | 0.67357400  |
| H | -10.39597600 | -4.43597200 | 0.44882500  |
| H | -9.48458800  | -4.13518000 | -1.02756900 |
| H | -8.83801800  | 1.97187100  | -1.52321800 |
| H | -7.51661800  | 0.79108200  | -1.57824400 |
| H | -8.95711600  | 0.55860800  | -2.58127900 |
| H | -11.23578100 | -0.02755900 | -1.47176900 |
| H | -11.35052300 | -0.05625600 | 0.29708900  |
| H | -10.99189400 | 1.45471800  | -0.54258000 |
| H | -6.92492400  | -5.75648300 | 1.22387300  |
| H | -8.62829000  | -6.22797900 | 1.09202800  |
| H | -7.69120300  | -5.87381900 | -0.36914500 |
| O | 6.51288900   | -0.90555700 | 0.31183700  |
| C | 7.59175200   | -1.69560100 | -0.25894500 |
| C | 8.89822800   | -1.40248300 | 0.50414400  |
| C | 7.17915400   | -3.16972100 | -0.21168900 |

|   |             |             |             |
|---|-------------|-------------|-------------|
| H | 7.70510500  | -1.38129100 | -1.30194400 |
| C | 9.98388700  | -2.34064800 | -0.07645500 |
| H | 8.74552900  | -1.69257900 | 1.55593600  |
| C | 9.28780500  | 0.11268400  | 0.47306000  |
| C | 8.27214000  | -4.09980500 | -0.76053700 |
| H | 6.95659500  | -3.43763200 | 0.83157800  |
| H | 6.25155400  | -3.29156800 | -0.78321400 |
| C | 9.59003100  | -3.82350400 | -0.02300000 |
| H | 10.92118400 | -2.19806400 | 0.47003500  |
| H | 10.18825700 | -2.05890300 | -1.12045300 |
| H | 8.93822900  | 0.51973900  | -0.48804300 |
| C | 8.60081600  | 0.90400900  | 1.60155500  |
| C | 10.80304700 | 0.37497200  | 0.54838400  |
| H | 8.42360600  | -3.85062800 | -1.82288200 |
| C | 7.85571800  | -5.57223500 | -0.67437600 |
| H | 10.39639100 | -4.43557000 | -0.44851200 |
| H | 9.48449100  | -4.13518900 | 1.02764900  |
| H | 8.83757700  | 1.97197700  | 1.52392500  |
| H | 7.51590800  | 0.79145100  | 1.57794500  |
| H | 8.95566700  | 0.55860000  | 2.58194500  |
| H | 11.23509000 | -0.02758600 | 1.47383800  |
| H | 11.35097600 | -0.05604500 | -0.29494900 |
| H | 10.99182700 | 1.45481700  | 0.54468600  |
| H | 6.92565600  | -5.75610400 | -1.22501400 |
| H | 8.62900800  | -6.22753400 | -1.09274700 |
| H | 7.69143800  | -5.87379100 | 0.36821800  |

#### 1d'-b

B3LYP/6-31g(d),

el. energy = -2042.302917 a.u.

|   |             |            |             |
|---|-------------|------------|-------------|
| C | -0.71574900 | 2.39247700 | -1.08333200 |
| C | 0.71569500  | 2.39262100 | 1.08304700  |
| H | 1.31816000  | 2.39177900 | 1.99488200  |
| H | -1.31821300 | 2.39151200 | -1.99516700 |
| C | -1.40842700 | 1.68777800 | 0.08614200  |
| C | -0.63113200 | 1.68820200 | 1.25589600  |
| C | -2.66357500 | 1.09717600 | 0.04636100  |
| C | -1.12500800 | 1.08379600 | 2.40405900  |
| C | -3.16023200 | 0.48674900 | 1.21344800  |
| H | -3.26157200 | 1.09819000 | -0.85524100 |
| C | -2.38706500 | 0.48454600 | 2.38239700  |
| H | -0.53917600 | 1.07172000 | 3.31992800  |
| H | -2.77370500 | 0.01056800 | 3.28227400  |
| C | 1.40831200  | 1.68763700 | -0.08629000 |
| C | 0.63102000  | 1.68791300 | -1.25604700 |
| C | 2.66339600  | 1.09691100 | -0.04638300 |
| C | 1.12485200  | 1.08324900 | -2.40409300 |
| C | 3.16001200  | 0.48623100 | -1.21335600 |
| H | 3.26138100  | 1.09803100 | 0.85522700  |
| C | 2.38686000  | 0.48389700 | -2.38231400 |
| H | 0.53903000  | 1.07105600 | -3.31996800 |
| H | 2.77347100  | 0.00973900 | -3.28210900 |
| C | -0.38904800 | 3.80296900 | -0.58584000 |
| C | 0.38911500  | 3.80304600 | 0.58528500  |
| C | -0.77804400 | 5.00222300 | -1.16944700 |
| C | 0.77821600  | 5.00237900 | 1.16866200  |
| C | -0.38624300 | 6.21239100 | -0.58073200 |
| H | -1.38130600 | 5.00227500 | -2.07440500 |
| C | 0.38652000  | 6.21246700 | 0.57971400  |
| H | 1.38147800  | 5.00255300 | 2.07361900  |
| H | -0.68739700 | 7.15377500 | -1.03271400 |



|   |              |             |             |
|---|--------------|-------------|-------------|
| H | 0.68775600   | 7.15391200  | 1.03151600  |
| N | -4.42242100  | -0.13968600 | 1.27379300  |
| H | -4.68499000  | -0.53942800 | 2.16438100  |
| N | 4.42212400   | -0.14037200 | -1.27356700 |
| H | 4.68454800   | -0.54051100 | -2.16402000 |
| C | -5.36734500  | -0.26003000 | 0.28640700  |
| C | 5.36719700   | -0.26027400 | -0.28627200 |
| O | 5.28690400   | 0.15915700  | 0.85395800  |
| O | -5.28693500  | 0.15899300  | -0.85396300 |
| O | -6.43083100  | -0.94392700 | 0.79293300  |
| C | -7.56987700  | -1.12591200 | -0.09174100 |
| C | -8.27334800  | -2.45470800 | 0.24698900  |
| C | -8.48274900  | 0.09596600  | 0.04756400  |
| H | -7.17980400  | -1.17531000 | -1.11396700 |
| C | -9.52769300  | -2.54725500 | -0.65504200 |
| H | -8.62522100  | -2.39300900 | 1.28914400  |
| C | -7.31833300  | -3.68889100 | 0.13221300  |
| C | -9.74135700  | -0.01377700 | -0.82668600 |
| H | -8.77434600  | 0.19686000  | 1.10325500  |
| H | -7.91011400  | 0.99222600  | -0.21828600 |
| C | -10.45974700 | -1.33506300 | -0.51767900 |
| H | -10.08504200 | -3.45778600 | -0.41459900 |
| H | -9.21445000  | -2.64434300 | -1.70553900 |
| H | -6.59604100  | -3.46898900 | -0.66875400 |
| C | -6.52791500  | -3.92407000 | 1.43280100  |
| C | -8.02777400  | -5.00094100 | -0.24938200 |
| H | -9.41780500  | -0.04606400 | -1.87924800 |
| C | -10.65890800 | 1.20114500  | -0.65054300 |
| H | -11.32607500 | -1.45806400 | -1.18119600 |
| H | -10.85719800 | -1.29499400 | 0.50827900  |
| H | -5.82024200  | -4.75283400 | 1.31034700  |
| H | -5.96830100  | -3.03829800 | 1.73690400  |
| H | -7.20942900  | -4.19144200 | 2.25159900  |
| H | -8.78802500  | -5.27735200 | 0.49277200  |
| H | -8.51433100  | -4.95143300 | -1.22818500 |
| H | -7.29814200  | -5.81824200 | -0.28670400 |
| H | -10.13729500 | 2.13345700  | -0.89701400 |
| H | -11.54095000 | 1.12836500  | -1.29795800 |
| H | -11.01170200 | 1.28014100  | 0.38590700  |
| O | 6.43066800   | -0.94427100 | -0.79268300 |
| C | 7.56974400   | -1.12601000 | 0.09201200  |
| C | 8.27362100   | -2.45452900 | -0.24694800 |
| C | 8.48228800   | 0.09614200  | -0.04701600 |
| H | 7.17963800   | -1.17571400 | 1.11421300  |
| C | 9.52791300   | -2.54693800 | 0.65515500  |
| H | 8.62555000   | -2.39248800 | -1.28906200 |
| C | 7.31892100   | -3.68899700 | -0.13253400 |
| C | 9.74085800   | -0.01343300 | 0.82731500  |
| H | 8.77394500   | 0.19728200  | -1.10266700 |
| H | 7.90940200   | 0.99220000  | 0.21895200  |
| C | 10.45964800  | -1.33445900 | 0.51811700  |
| H | 10.08552700  | -3.45727000 | 0.41456500  |
| H | 9.21462300   | -2.64433100 | 1.70561100  |
| H | 6.59634700   | -3.46935500 | 0.66825000  |
| C | 6.52893200   | -3.92425000 | -1.43336600 |
| C | 8.02861300   | -5.00088400 | 0.24914300  |
| H | 9.41722900   | -0.04601200 | 1.87984400  |
| C | 10.65808500  | 1.20178100  | 0.65148400  |
| H | 11.32594400  | -1.45734800 | 1.18169400  |
| H | 10.85718400  | -1.29407700 | -0.50779500 |
| H | 5.82142400   | -4.75319700 | -1.31119500 |

|   |             |             |             |
|---|-------------|-------------|-------------|
| H | 5.96919500  | -3.03857600 | -1.73753700 |
| H | 7.21073900  | -4.19137300 | -2.25200100 |
| H | 8.78909400  | -5.27707000 | -0.49285800 |
| H | 8.51494900  | -4.95131200 | 1.22805400  |
| H | 7.29917600  | -5.81836700 | 0.28626400  |
| H | 10.13619200 | 2.13389800  | 0.89810100  |
| H | 11.54009800 | 1.12911900  | 1.29895200  |
| H | 11.01093600 | 1.28108300  | -0.38492200 |

# 1d'-c

B3LYP/6-31g(d),

el. energy = -2042.302473 a.u.

|   |             |             |             |
|---|-------------|-------------|-------------|
| C | -0.69166300 | 2.36849900  | -0.95140200 |
| C | 0.39934400  | 2.86841800  | 1.35153300  |
| H | 0.85688200  | 3.07921400  | 2.32197800  |
| H | -1.15107900 | 2.15765700  | -1.92018600 |
| C | -1.52056800 | 1.84558700  | 0.22495100  |
| C | -0.92712200 | 2.11554800  | 1.46913400  |
| C | -2.72925000 | 1.17087000  | 0.12720400  |
| C | -1.55967200 | 1.69952300  | 2.63273800  |
| C | -3.36719600 | 0.75162800  | 1.31000700  |
| H | -3.18655300 | 0.96476600  | -0.83139500 |
| C | -2.77730700 | 1.01891100  | 2.55297900  |
| H | -1.11756100 | 1.89853300  | 3.60607400  |
| H | -3.27322200 | 0.69318400  | 3.46502700  |
| C | 1.28566200  | 2.00930200  | 0.44686100  |
| C | 0.69401000  | 1.73797300  | -0.79820300 |
| C | 2.54187800  | 1.51369300  | 0.75309400  |
| C | 1.37838200  | 0.96601800  | -1.72643400 |
| C | 3.23441700  | 0.72936300  | -0.19068600 |
| H | 2.99613600  | 1.72671100  | 1.71961800  |
| C | 2.64948500  | 0.45707200  | -1.43348400 |
| H | 0.93193500  | 0.74772800  | -2.69371100 |
| H | 3.18477000  | -0.14563200 | -2.15380800 |
| C | -0.50177500 | 3.86561500  | -0.69450900 |
| C | 0.09200500  | 4.13665400  | 0.55098100  |
| C | -0.84880000 | 4.90681100  | -1.54636600 |
| C | 0.33810900  | 5.44712600  | 0.94096400  |
| C | -0.60071600 | 6.22912600  | -1.15332100 |
| H | -1.30890400 | 4.69788500  | -2.50935000 |
| C | -0.01157100 | 6.49757200  | 0.08139200  |
| H | 0.79728800  | 5.65679700  | 1.90447400  |
| H | -0.86990200 | 7.04747300  | -1.81585000 |
| H | 0.17816200  | 7.52493300  | 0.38084900  |
| N | -4.59363300 | 0.05622000  | 1.31463200  |
| H | -4.95848700 | -0.20857900 | 2.21942100  |
| N | 4.50841100  | 0.25750400  | 0.18767300  |
| H | 4.82843800  | 0.51362700  | 1.11164200  |
| C | -5.39151900 | -0.28194800 | 0.25024600  |
| C | 5.36914800  | -0.54419900 | -0.51909400 |
| O | 5.19148500  | -0.99764200 | -1.63451400 |
| O | -5.17921300 | -0.04206700 | -0.92417600 |
| O | 6.48137700  | -0.75059000 | 0.24003500  |
| C | 7.49388000  | -1.63439500 | -0.31397400 |
| C | 8.88374100  | -1.19579100 | 0.18712400  |
| C | 7.13525100  | -3.07199700 | 0.07395900  |
| H | 7.45349200  | -1.52922400 | -1.40342400 |
| C | 9.90640800  | -2.22740200 | -0.34757300 |
| H | 8.88527400  | -1.27487600 | 1.28600600  |
| C | 9.22185500  | 0.28464800  | -0.19044700 |
| C | 8.16906900  | -4.08927500 | -0.43295400 |

|   |              |             |             |
|---|--------------|-------------|-------------|
| H | 7.06626700   | -3.13150400 | 1.17008000  |
| H | 6.14194100   | -3.30466200 | -0.32727200 |
| C | 9.56695800   | -3.67212200 | 0.04544900  |
| H | 10.90514900  | -1.97927500 | 0.02449500  |
| H | 9.95766400   | -2.15440600 | -1.44444900 |
| H | 8.73490400   | 0.49470300  | -1.15500100 |
| C | 8.67037200   | 1.28082300  | 0.84646600  |
| C | 10.72539500  | 0.55901700  | -0.37613100 |
| H | 8.16611300   | -4.05190600 | -1.53393400 |
| C | 7.81137400   | -5.51734600 | -0.00682700 |
| H | 10.32494800  | -4.35388100 | -0.36268700 |
| H | 9.61545100   | -3.77313400 | 1.14073700  |
| H | 8.86445000   | 2.31317500  | 0.53145000  |
| H | 7.59572100   | 1.16429600  | 0.99396900  |
| H | 9.16319200   | 1.13473100  | 1.81715000  |
| H | 11.28915900  | 0.34575300  | 0.54143100  |
| H | 11.16697900  | -0.02769100 | -1.18728300 |
| H | 10.88130100  | 1.61759600  | -0.61452700 |
| H | 6.82024200   | -5.80664800 | -0.37556500 |
| H | 8.53857800   | -6.24038300 | -0.39520400 |
| H | 7.80069600   | -5.60992600 | 1.08691700  |
| O | -6.47805600  | -0.94978700 | 0.72727000  |
| C | -7.48530100  | -1.34057500 | -0.24574400 |
| C | -8.14740400  | -2.65712900 | 0.20539900  |
| C | -8.47539600  | -0.18141100 | -0.39338900 |
| H | -6.96889500  | -1.50404000 | -1.19754800 |
| C | -9.28022900  | -2.96596000 | -0.80334300 |
| H | -8.62162900  | -2.47696900 | 1.18336100  |
| C | -7.11781100  | -3.82303200 | 0.37543200  |
| C | -9.61411900  | -0.50529400 | -1.37278000 |
| H | -8.89527600  | 0.04805700  | 0.59694400  |
| H | -7.92588200  | 0.70700800  | -0.72645000 |
| C | -10.28844000 | -1.81752000 | -0.94836300 |
| H | -9.80995100  | -3.87161400 | -0.49251600 |
| H | -8.84079500  | -3.18680200 | -1.78783600 |
| H | -6.32417500  | -3.66890800 | -0.37160300 |
| C | -6.46501700  | -3.81365000 | 1.77029200  |
| C | -7.70634400  | -5.22342800 | 0.12421900  |
| H | -9.16797700  | -0.66380800 | -2.36747300 |
| C | -10.61219400 | 0.65275400  | -1.48052800 |
| H | -11.06359600 | -2.09591000 | -1.67467700 |
| H | -10.80389800 | -1.66102600 | 0.01183400  |
| H | -5.70577200  | -4.60128900 | 1.84634000  |
| H | -5.98936700  | -2.85752500 | 1.99338800  |
| H | -7.21798800  | -4.00630500 | 2.54639100  |
| H | -8.52865900  | -5.44405100 | 0.81731000  |
| H | -8.08190400  | -5.34950400 | -0.89570500 |
| H | -6.93306300  | -5.98355300 | 0.28522500  |
| H | -10.11805700 | 1.57572500  | -1.80609000 |
| H | -11.40668700 | 0.42485800  | -2.20111400 |
| H | -11.08801000 | 0.85277600  | -0.511754   |

### 3. NMR spectra of known and new compounds

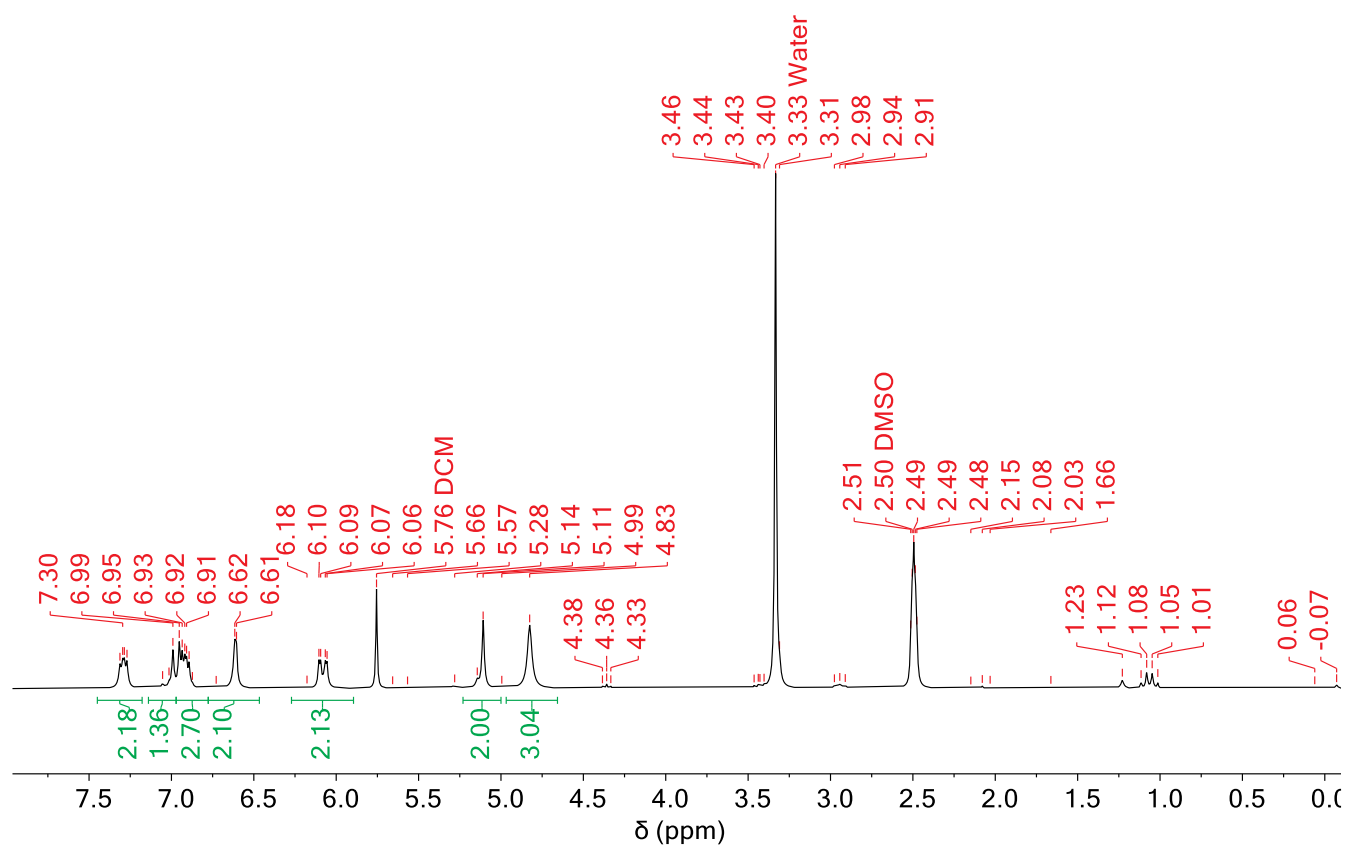

**Figure S5.** <sup>1</sup>H-NMR of compound **Tripty-NH<sub>2</sub>**.

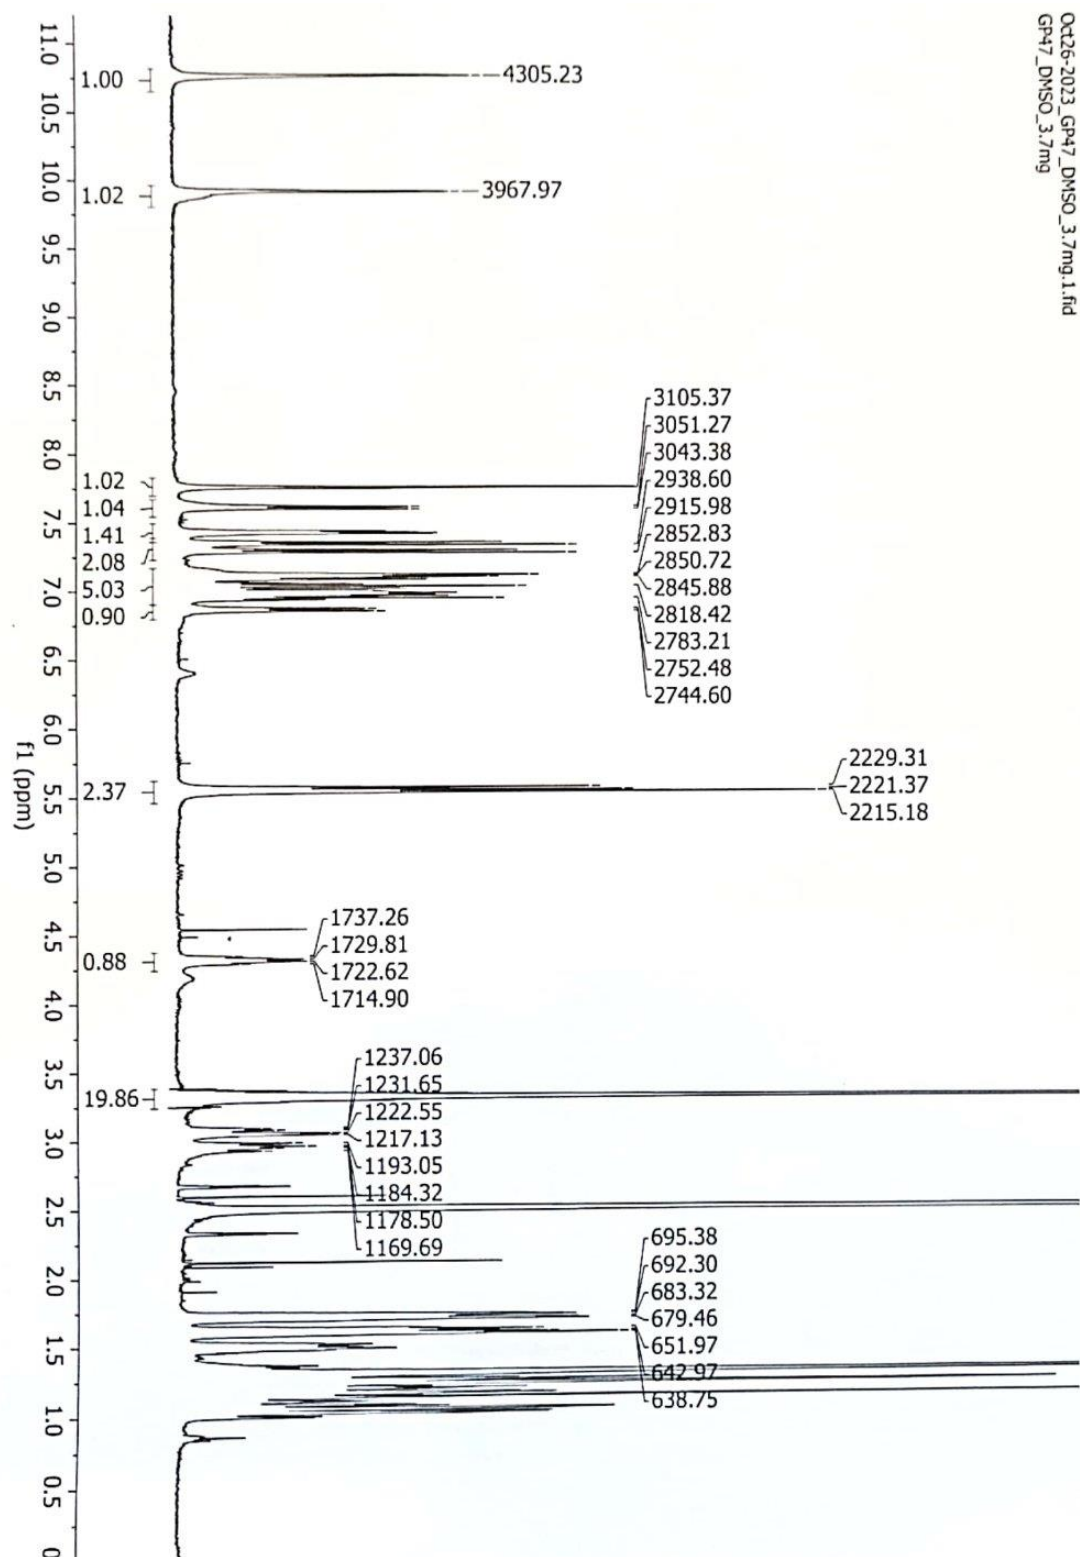

Figure S6.  $^1\text{H}$ -NMR of compound **1a**.

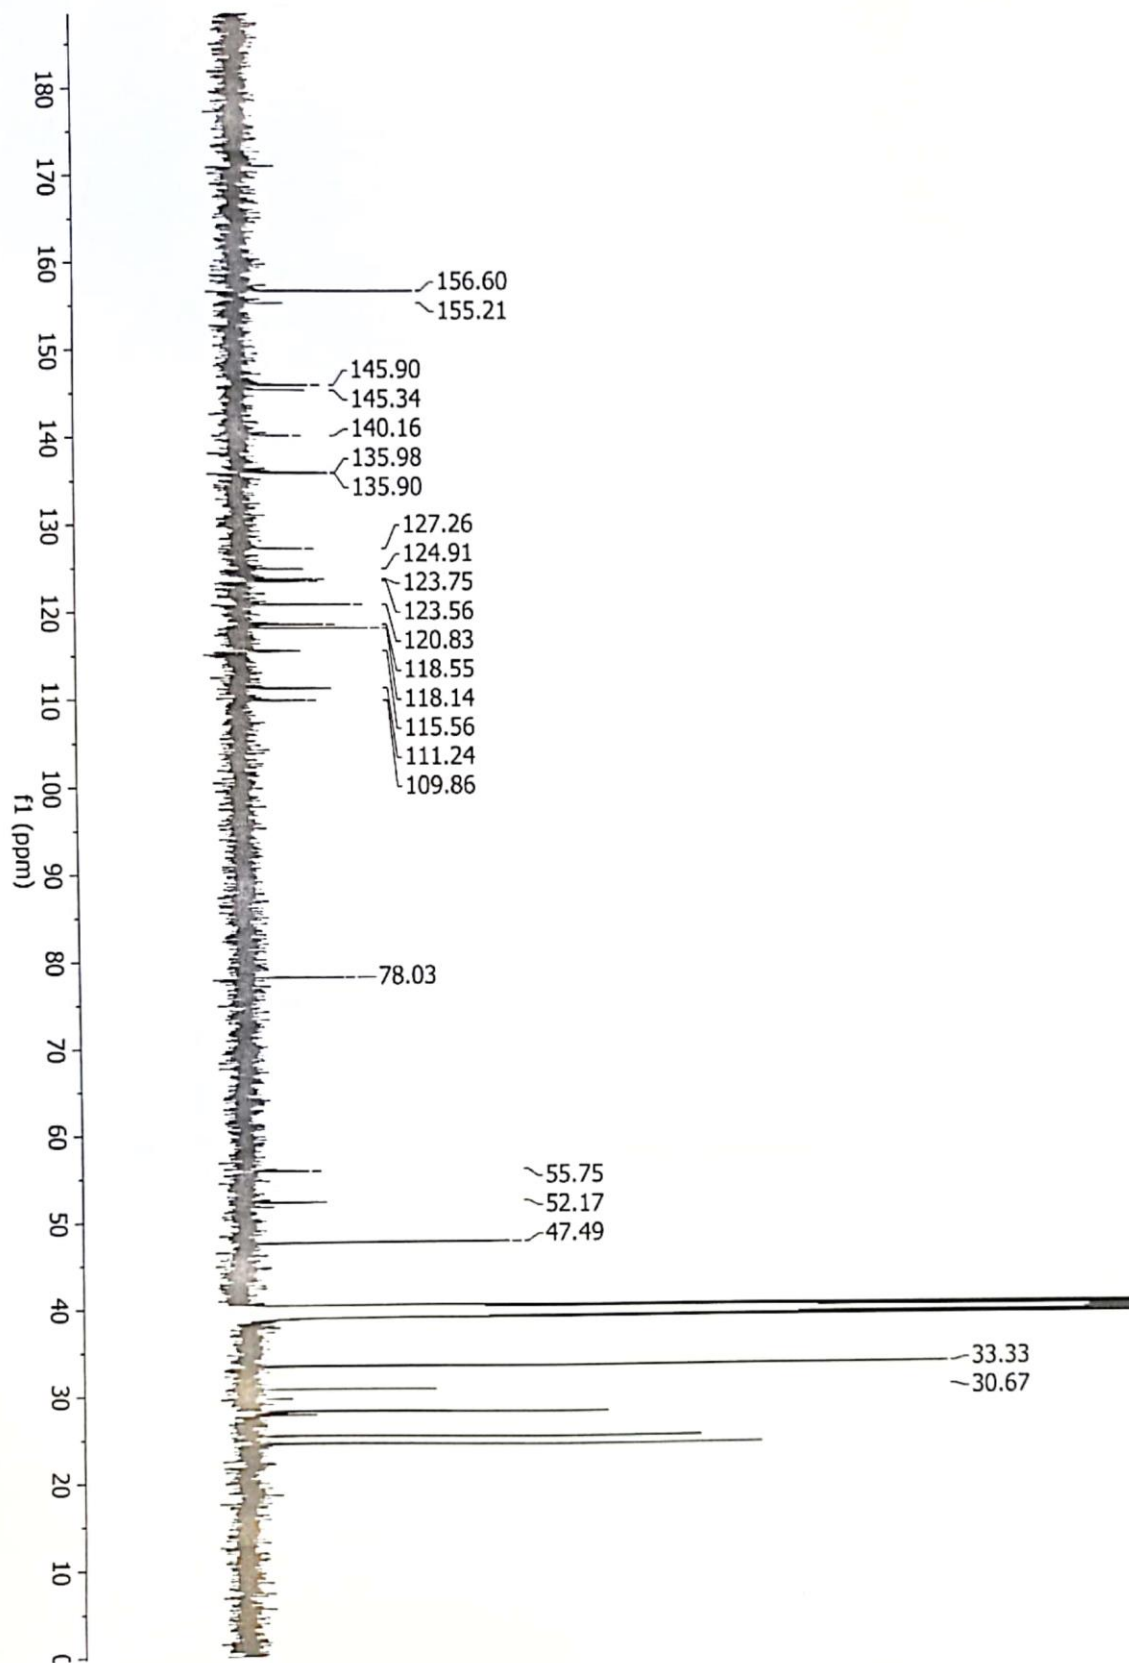

**Figure S7.**  $^{13}\text{C}$ -NMR of compound **1a**.



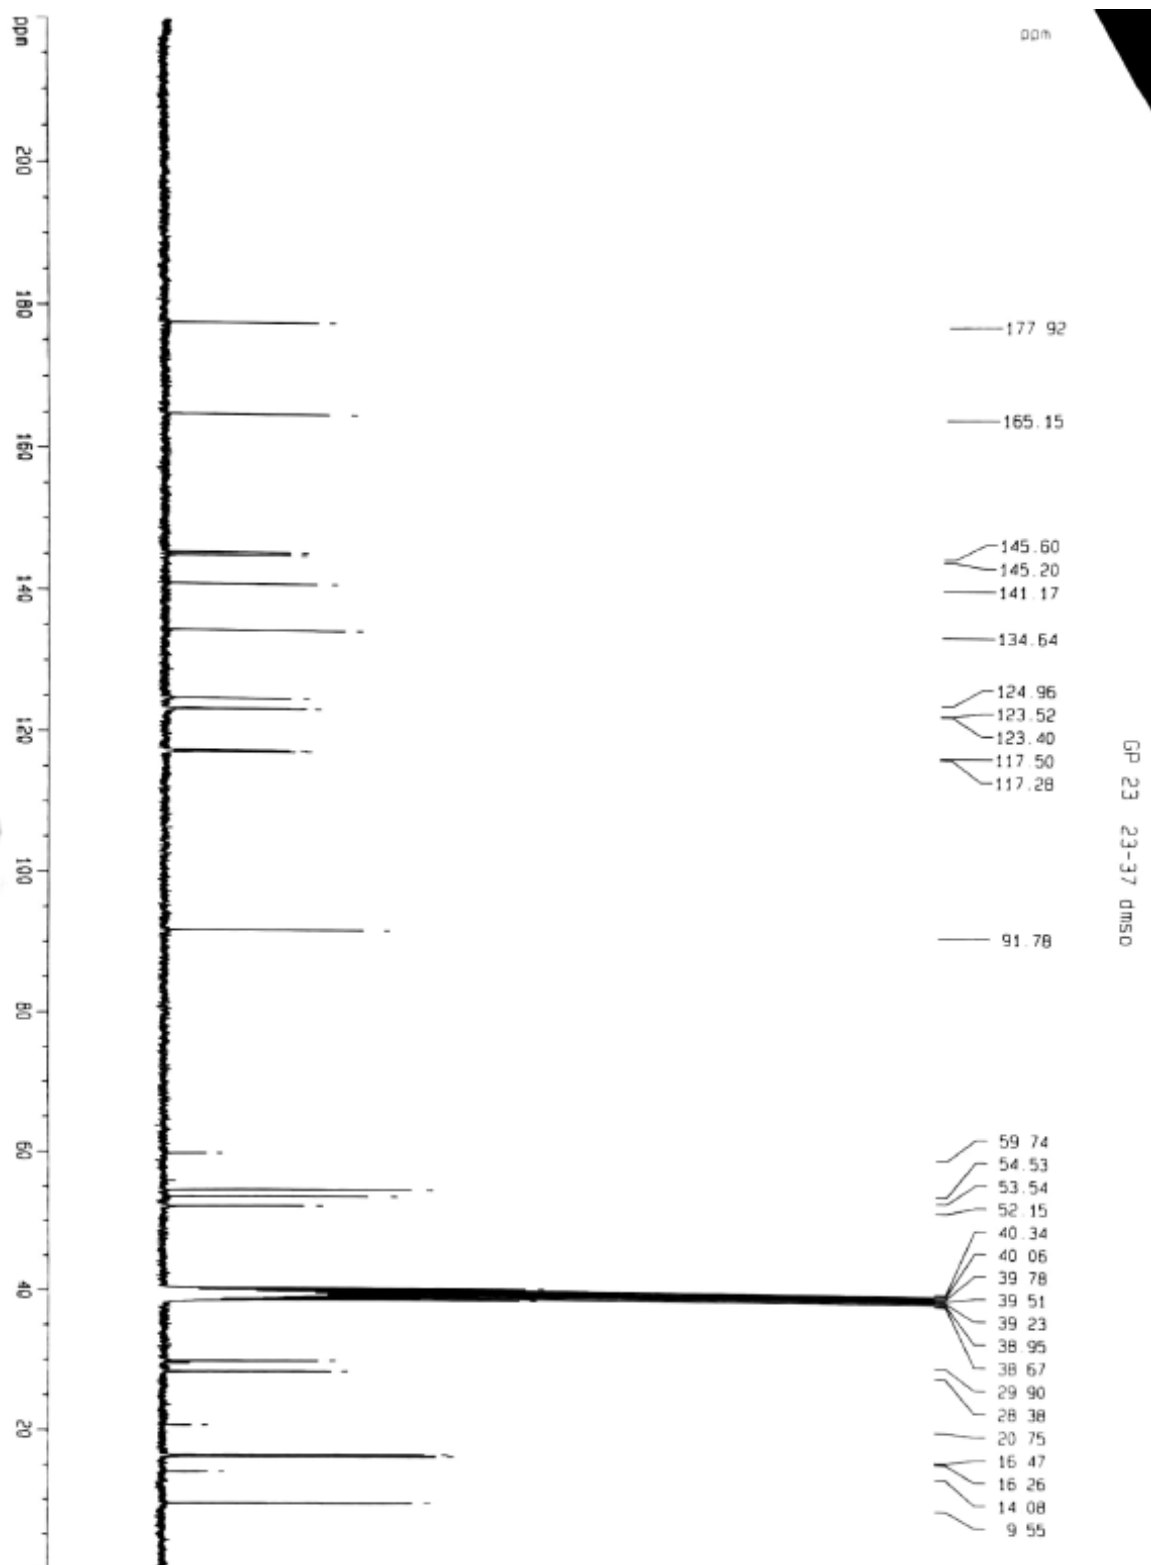

Figure S9. <sup>13</sup>C-NMR of compound **1b**.

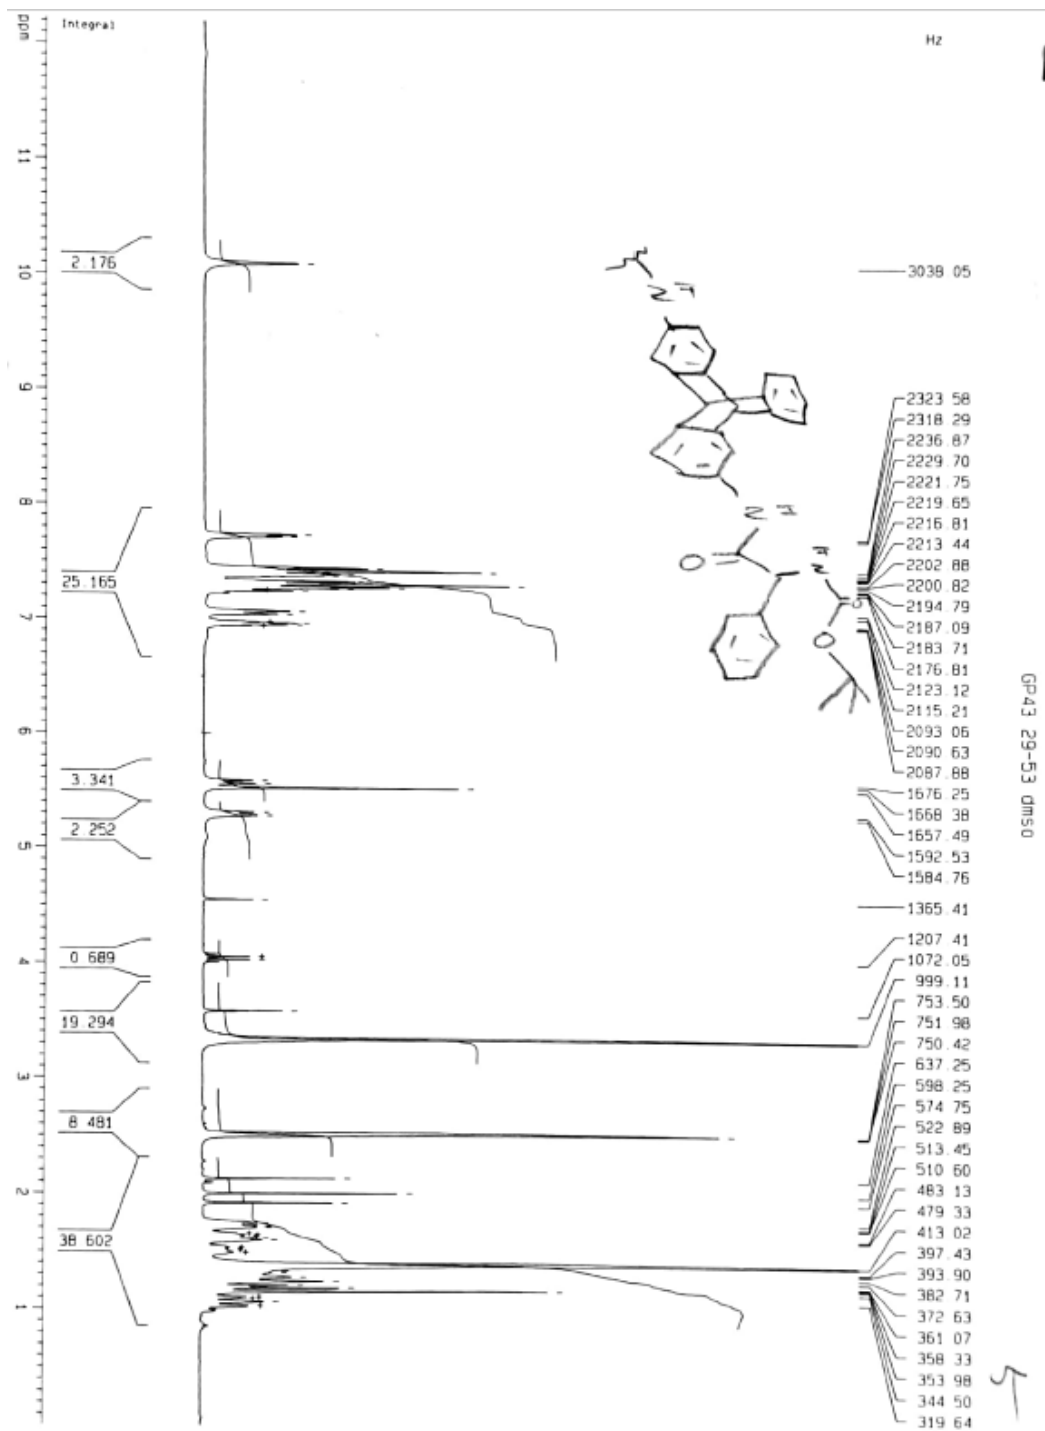

**Figure S10.** <sup>1</sup>H-NMR spectrum of **1c**.



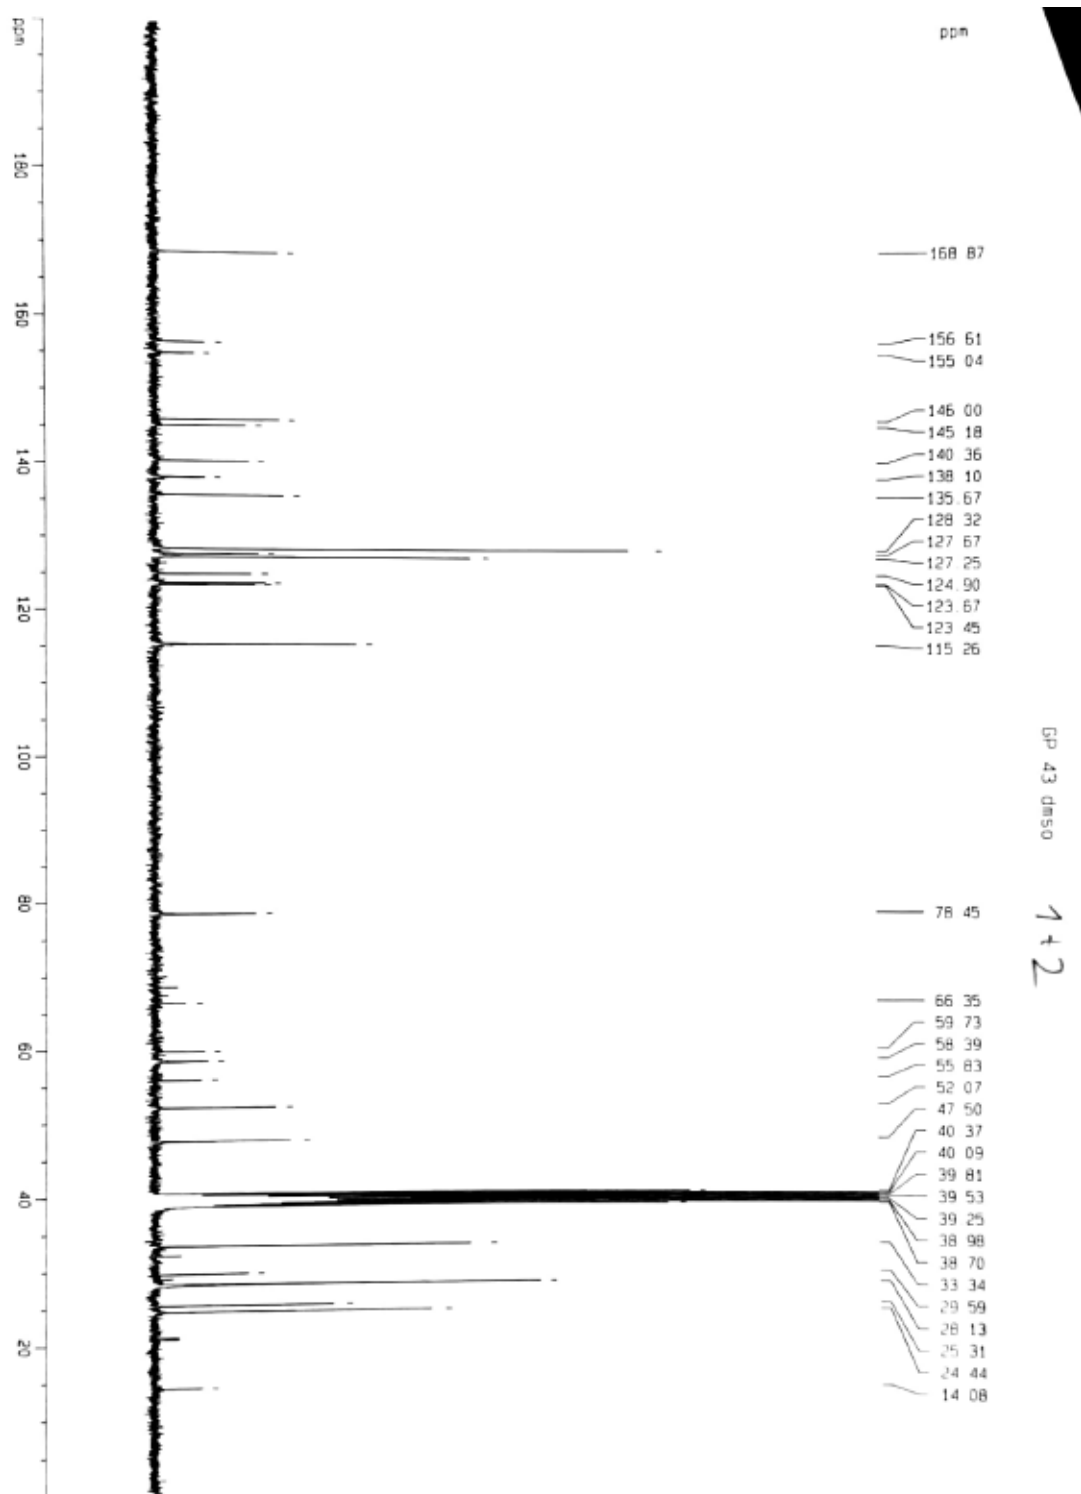

Figure S11.  $^{13}\text{C}$ -NMR spectrum of **1c**.

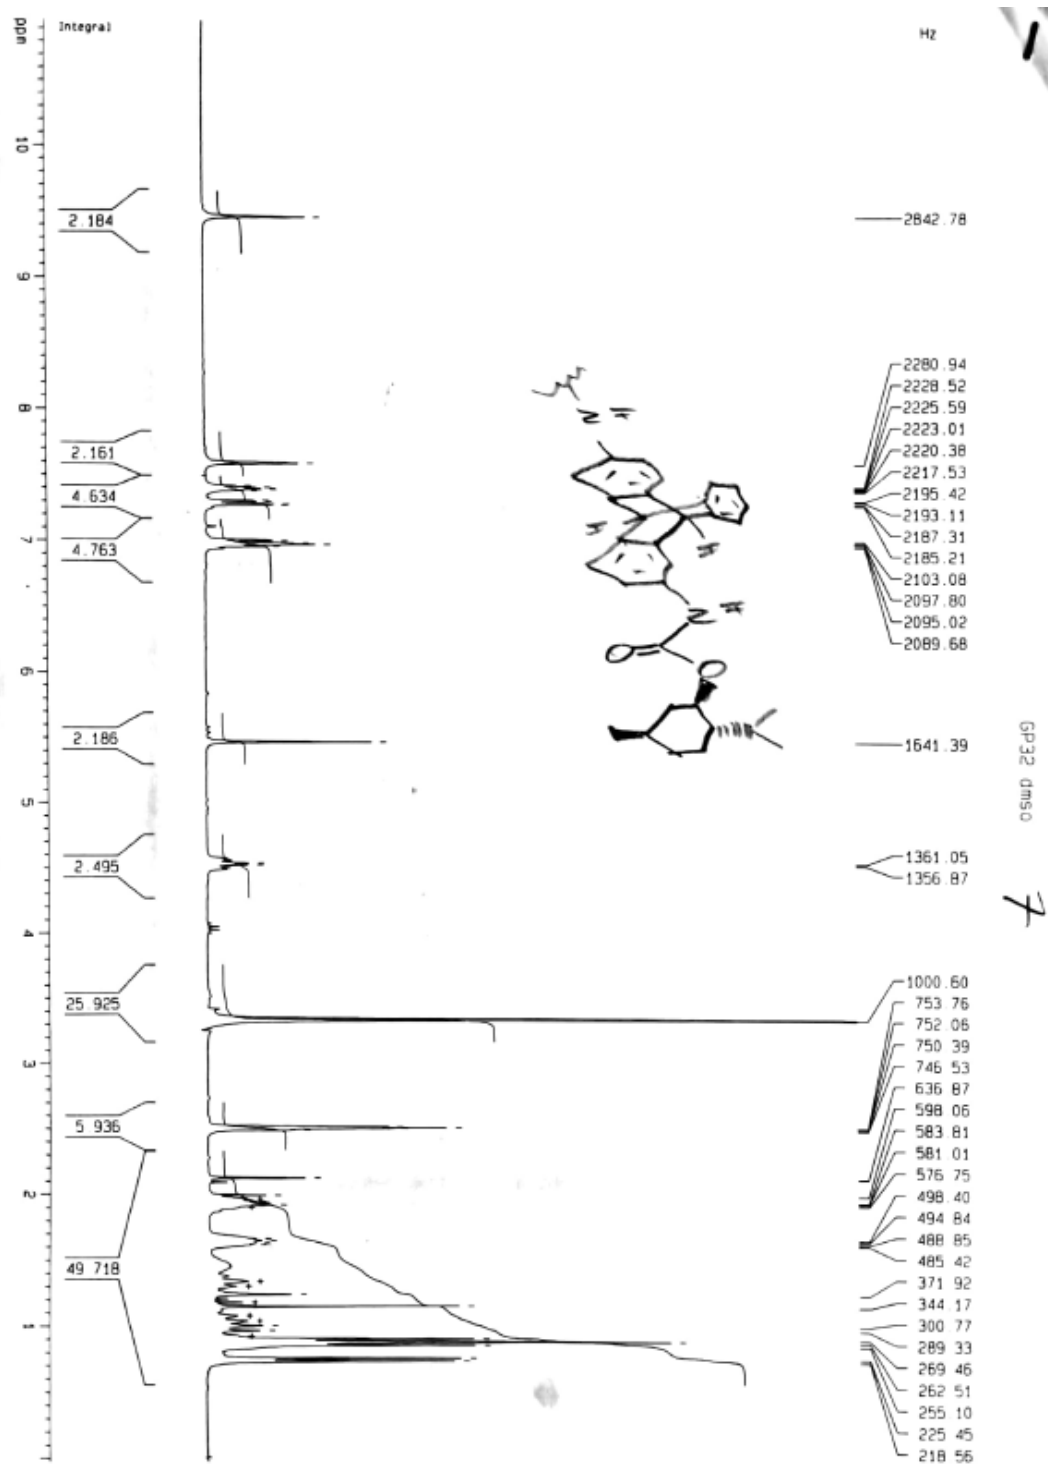

**Figure S12.** <sup>1</sup>H-NMR spectrum of **1d**.

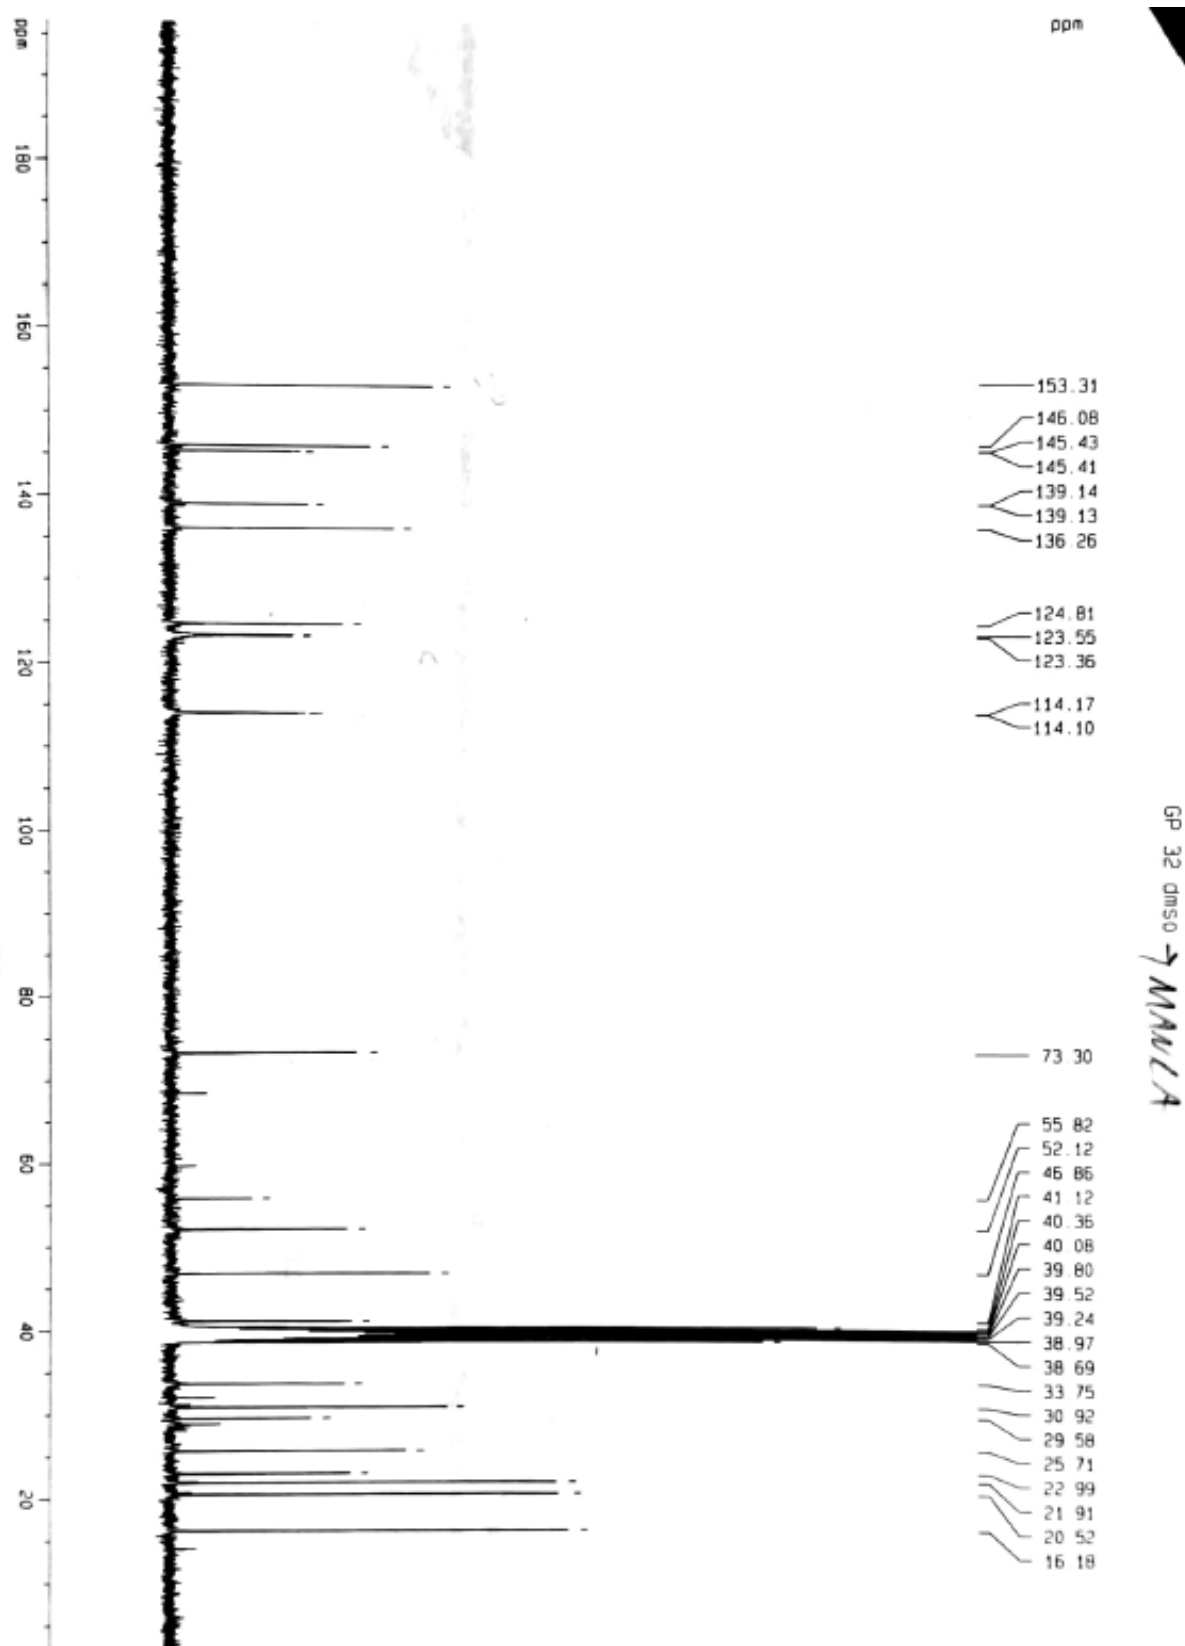

Figure S13.  $^{13}\text{C}$ -NMR spectrum of **1d**.

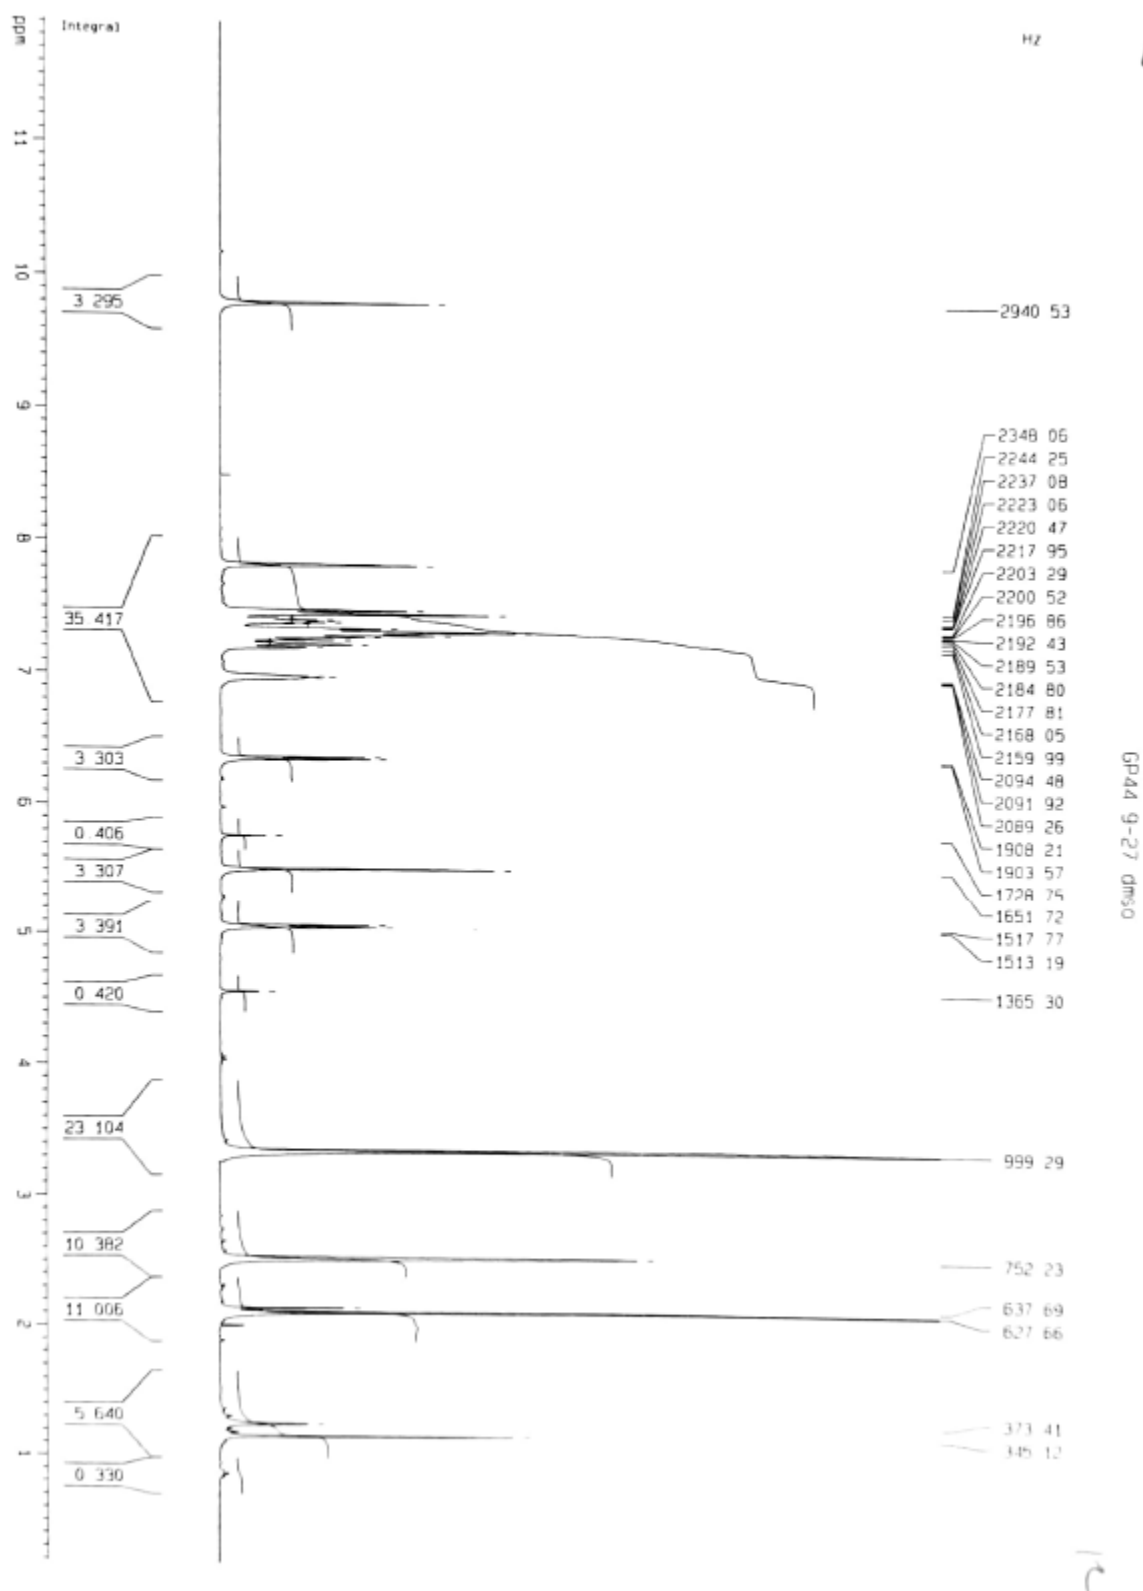

**Figure S14.**  $^1\text{H}$ -NMR spectrum of **1e**.

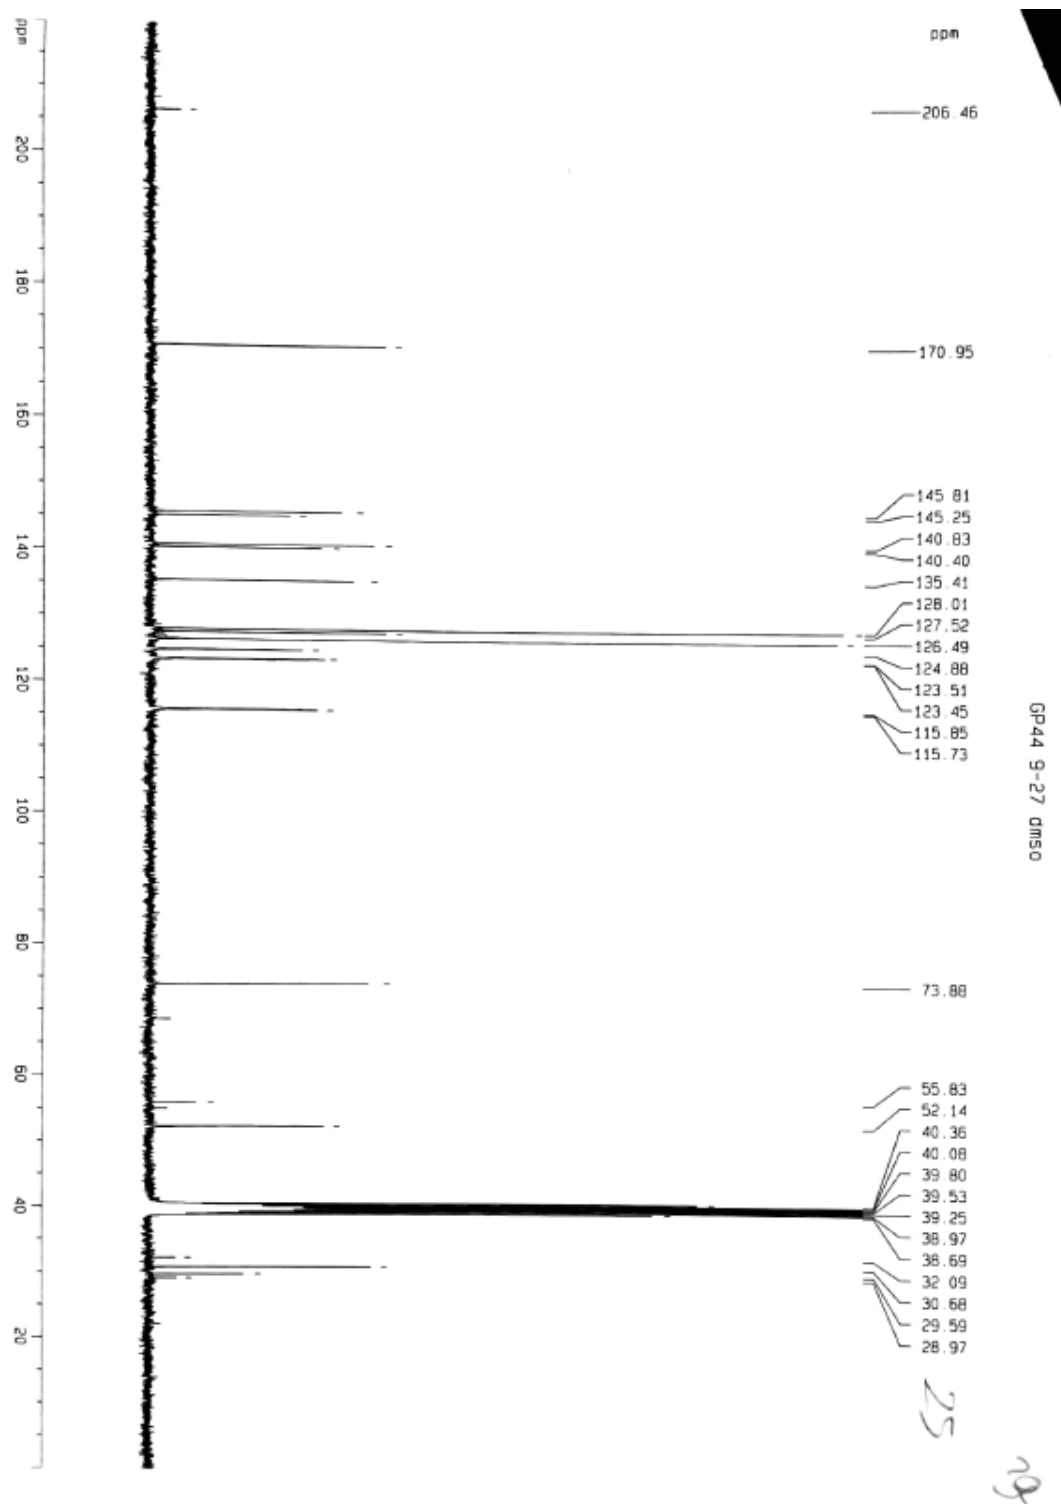

Figure S15.  $^1\text{H}$ NMR spectrum of **1e**.

## Mass spectra of new compounds

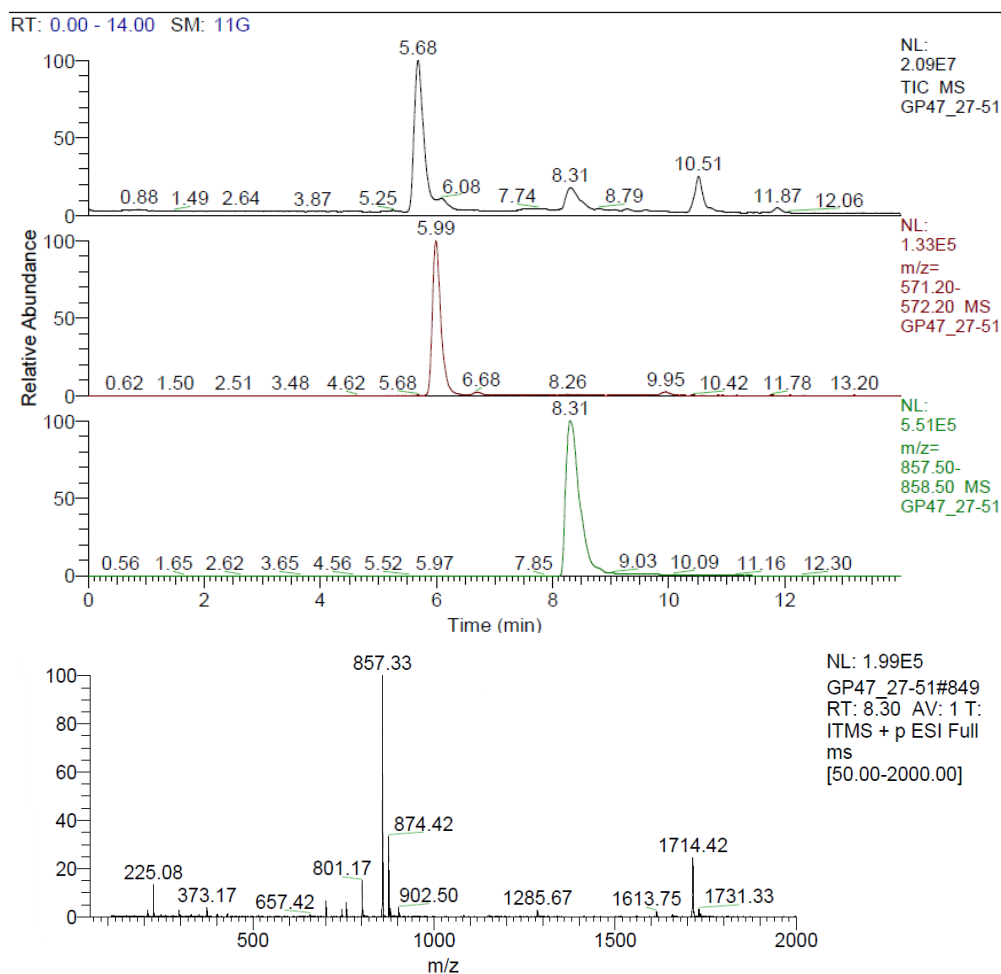

F\_200722\_UPLC\_2nd GP47\_27-51

7/22/2020

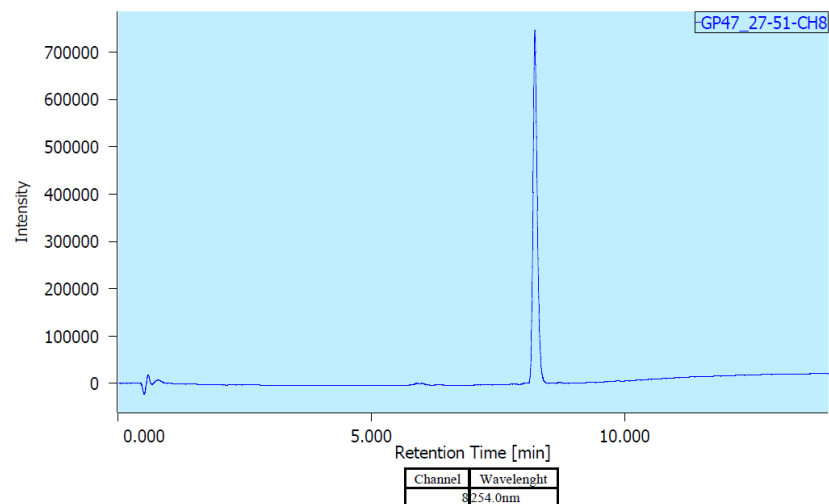

**Figure S16.** Mass spectrum and UPLC-UV-vis chromatogram of **1a**.

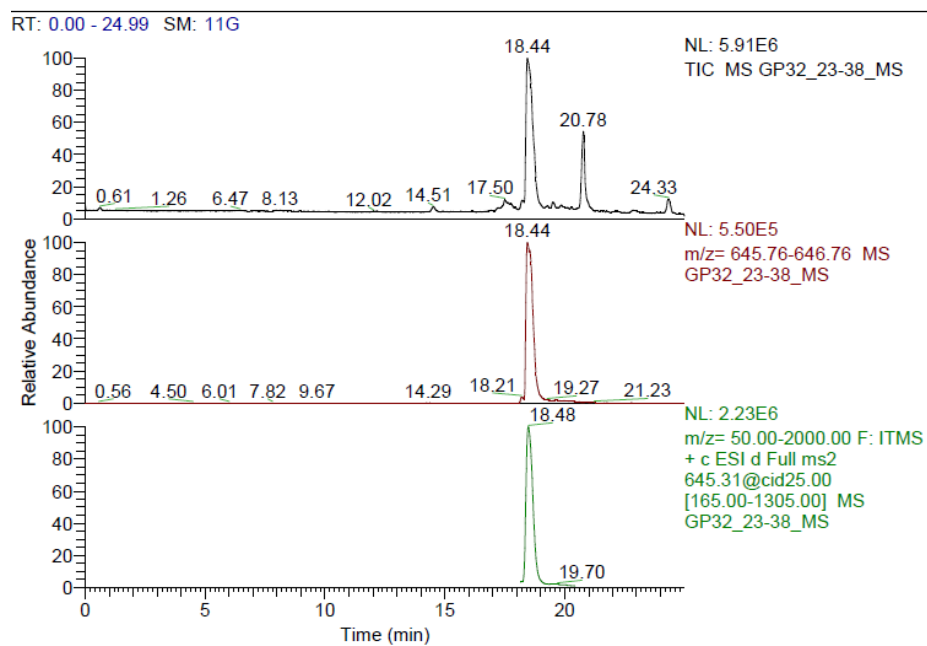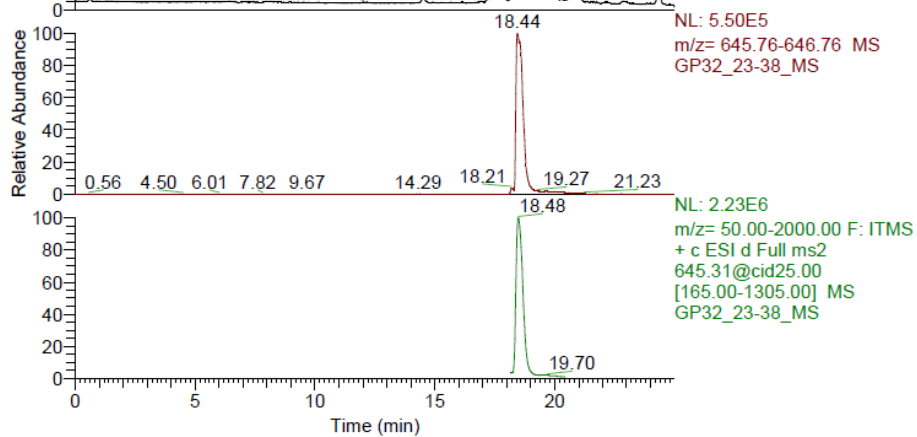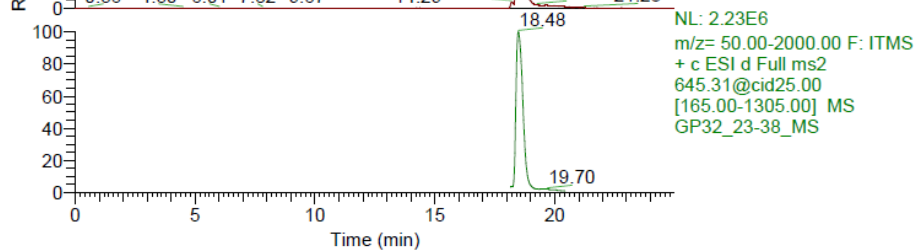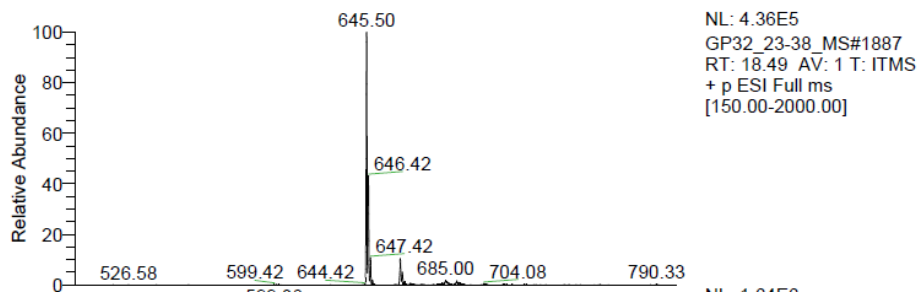

G\_200609\_UPLC\_1 GP23\_23-38\_MS

6/10/2020

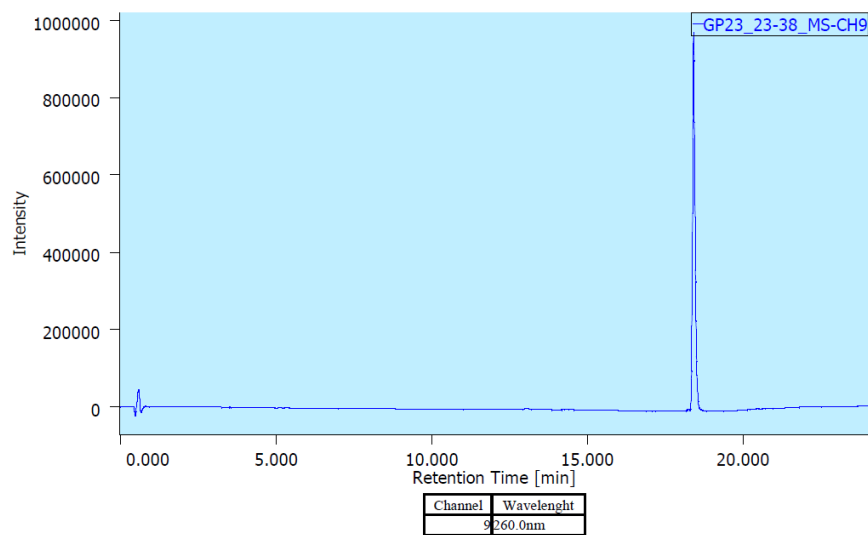

**Figure S17.** Mass spectrum and UPLC-UV-vis chromatogram of compound **1b**.

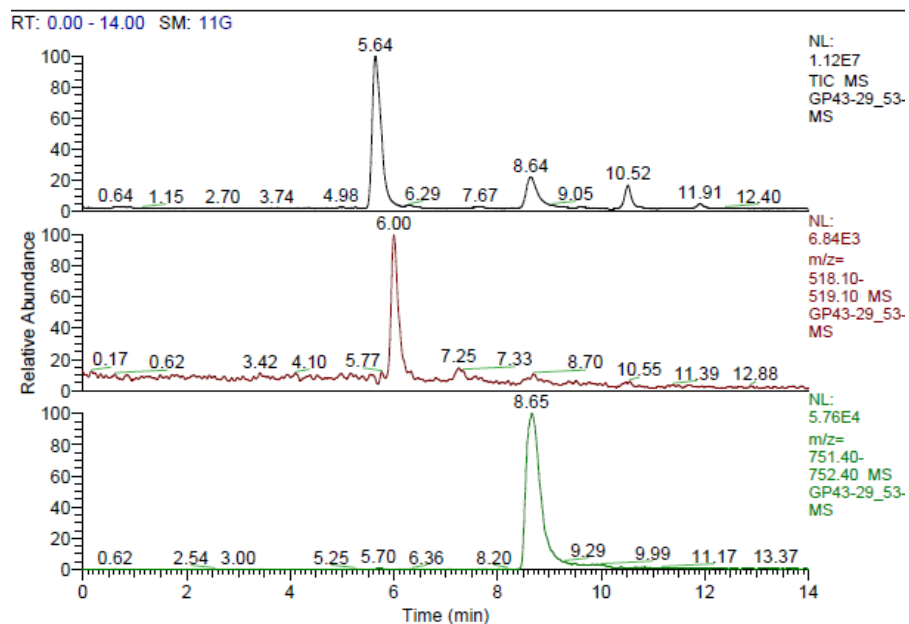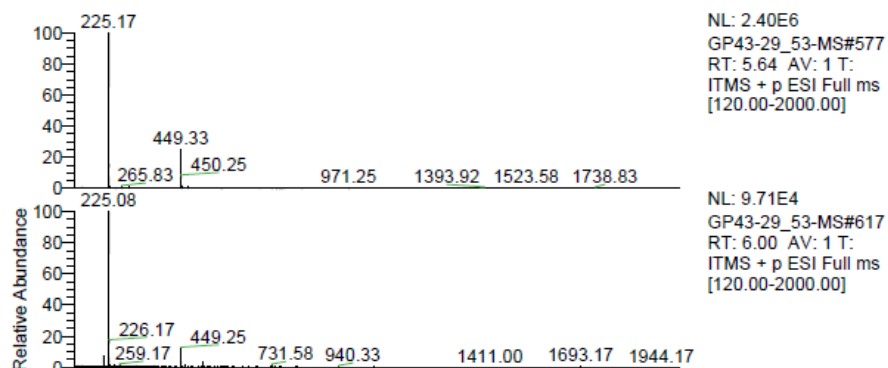

F\_200702\_UPLC\_2nd GP43-29\_53-MS 7/6/2020

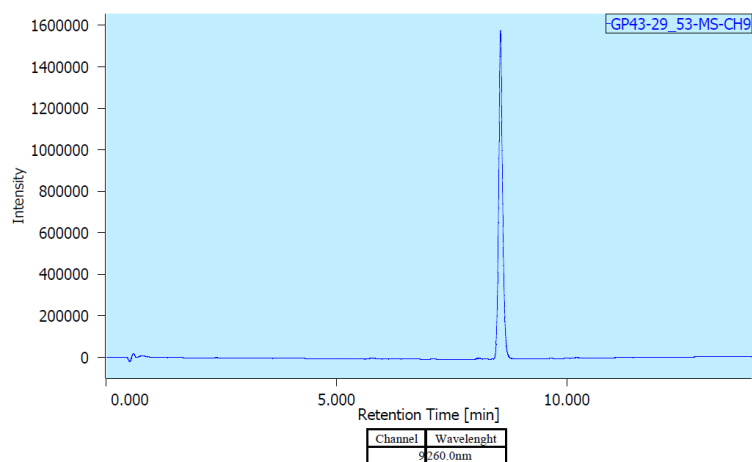

**Figure S18.** Mass spectrum and UPLC-UV-vis chromatogram of **1c**.



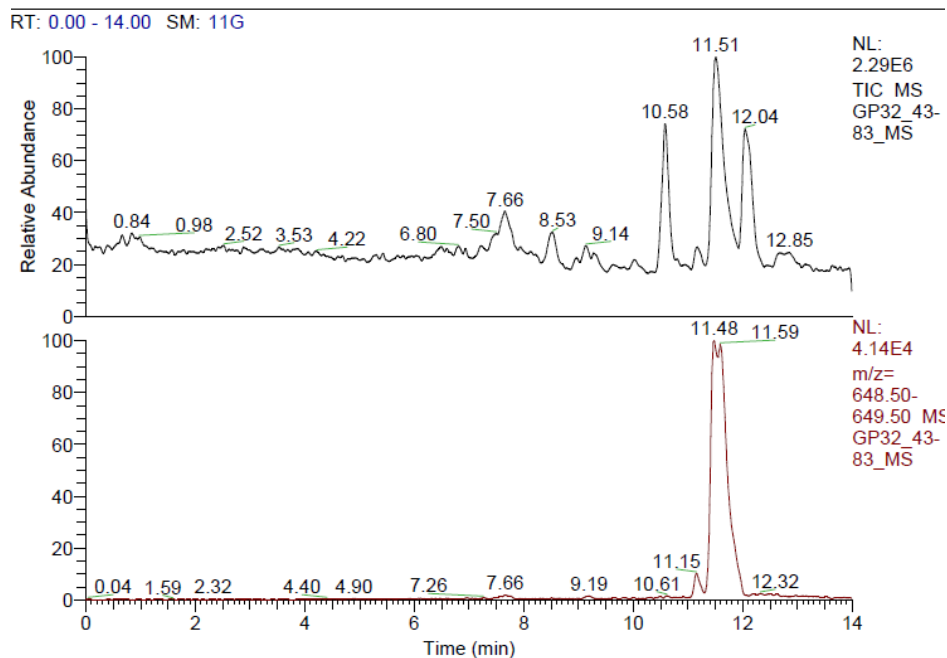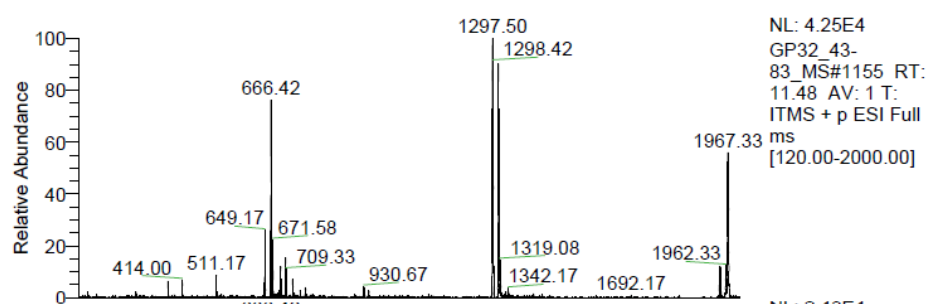

F\_200604\_UPLC\_1 GP32\_G\_MS

6/4/2020

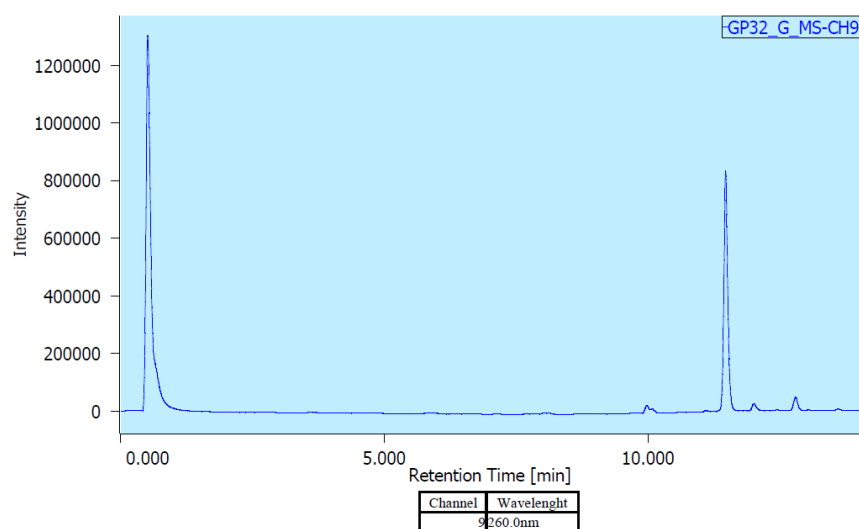

**Figure S19.** Mass spectrum and UPLC-UV-vis chromatogram of **1d**.

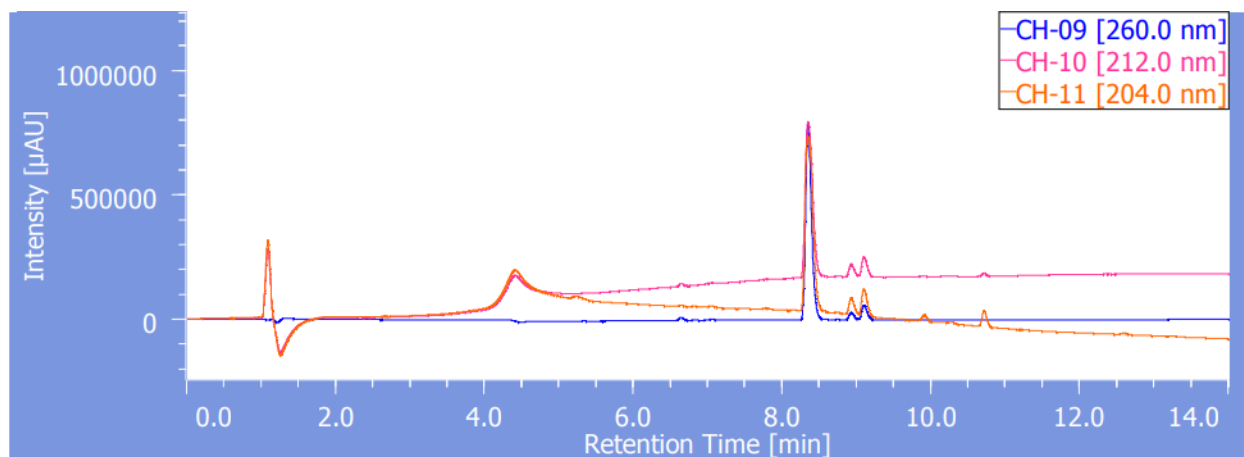

C:\Xcalibur\...\Acquity\F231115\GP44

11/15/2023 10:51:42 AM

RT: 0.00 - 14.00 SM: 15G

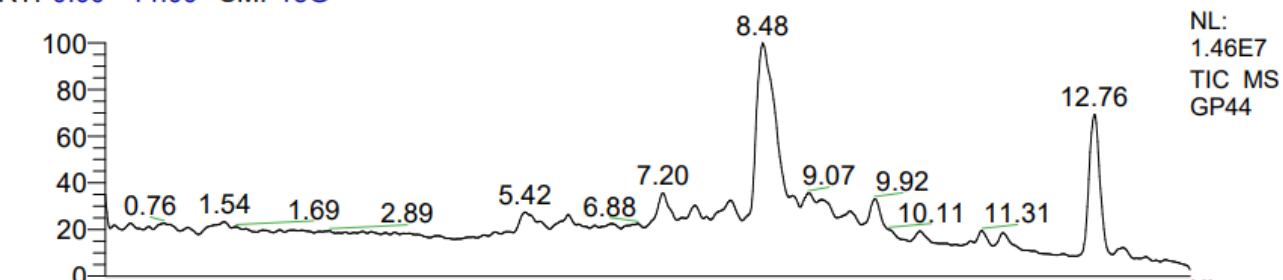

NL:  
1.46E7  
TIC MS  
GP44

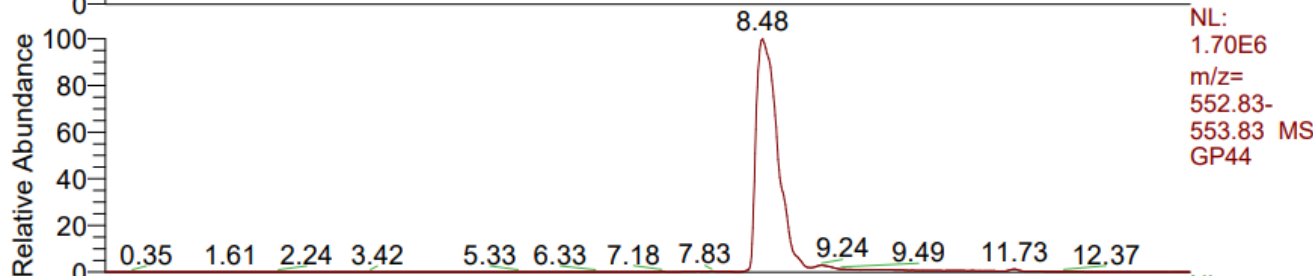

NL:  
1.70E6  
m/z=  
552.83-  
553.83 MS  
GP44

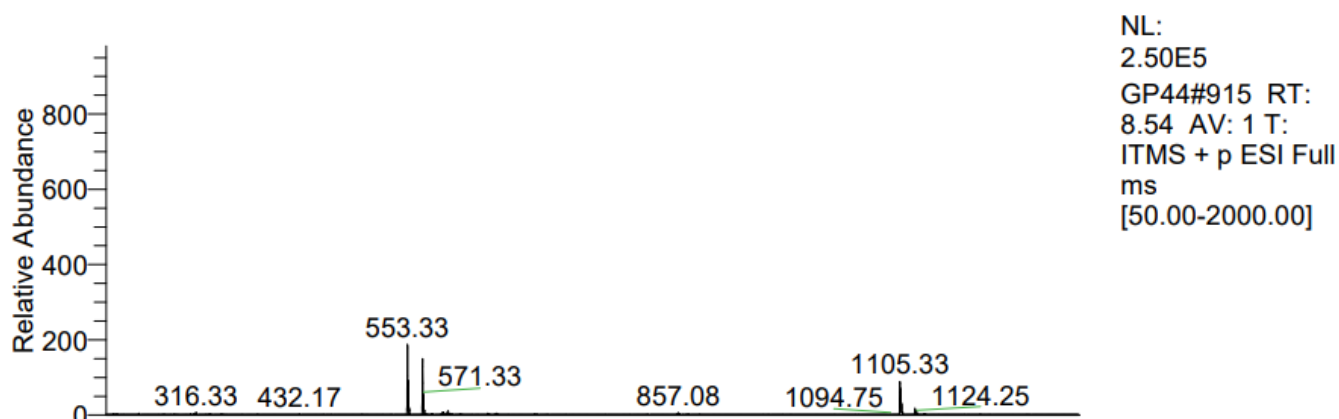

NL:  
2.50E5  
GP44#915 RT:  
8.54 AV: 1 T:  
ITMS + p ESI Full  
ms  
[50.00-2000.00]

**Figure S20.** Mass spectrum and UPLC-UV-vis chromatogram of **1e**.
